# Supplementary material
Source: bioRxiv or medRxiv preprint supplement (https://www.biorxiv.org/highwire/filestream/68636/field_highwire_adjunct_files/3/224733-4.pdf)
Supplement: Supplementary file [file 224733-4.pdf]

## ICGC-TCGA DREAM Somatic Mutation Calling Challenge Submission Documentation Form

|                 |                                                                                                                            |
|-----------------|----------------------------------------------------------------------------------------------------------------------------|
| Submission name | Subfusion-indel2 (18 <sup>th</sup> , March 2014)                                                                           |
| Team            | WEHI-Subread                                                                                                               |
| Submission type | <input type="checkbox"/> INDEL or <input checked="" type="checkbox"/> SV or <input type="checkbox"/> SNV (Only choose one) |

### 1. Read alignment. Did you use the BAM files provided?

Yes  No (Specify your aligner below)

|                               |                                                                                                                                                                                                                                                                                                                                             |         |       |
|-------------------------------|---------------------------------------------------------------------------------------------------------------------------------------------------------------------------------------------------------------------------------------------------------------------------------------------------------------------------------------------|---------|-------|
| Aligner                       | Subread                                                                                                                                                                                                                                                                                                                                     | Version | 1.4.4 |
| Command lines with parameters | <pre>subread-align -r tumor.BAM --BAMinput --reportFusions -i hg19 -o tumor-fusions.sam -m 1 -p 1 -n 28 -d 50 -D 600 -I 5</pre> <p>(We used the provided BAM files only for the purpose of retrieving the read sequences. We re-aligned all the reads. The mapping results included in the provided BAM were not used in our analysis.)</p> |         |       |

### 2. Pre-processing steps to calibrate the BAM files. (Command lines and parameters)

N/A

### 3. Mutation calling algorithm.

|                |         |         |       |
|----------------|---------|---------|-------|
| Algorithm name | subread | Version | 1.4.4 |
|----------------|---------|---------|-------|

Command lines with parameters

```
subread-align -r tumor.BAM --BAMinput --reportFusions -i hg19 -o tumor-fusions.sam -m 1 -p 1 -n 28 -d 50 -D 600 -I 5
```

(This command is the same as the command shown above for read alignment. The SVs were called during read alignment and we do not need an extra step to call them.)

Thresholds not indicated by command line

N/A

Reference  
( check if unpublished  )

Liao Y, Smyth GK and Shi W (2013). [The Subread aligner: fast, accurate and scalable read mapping by seed-and-vote](#). *Nucleic Acids Research*, 41(10):e108

---

#### 4. Post-VCF filtering steps. (Command lines and parameters)

We performed filtering for subread-align output using the following criteria

**N >= 10 && (absent in matched normal)**

We required each called SV to have at least 10 supporting reads and each called SV should not be present in matched normal sample.

---

#### 5. (Optional) Any other comments or steps not covered.

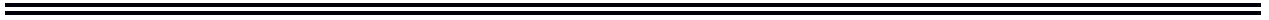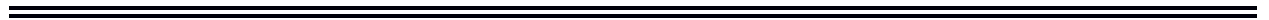

## ICGC-TCGA DREAM Somatic Mutation Calling Challenge Submission Documentation Form

|                 |                                |    |                                        |
|-----------------|--------------------------------|----|----------------------------------------|
| Submission name | Delly                          |    |                                        |
| Team            | DellyTeam                      |    |                                        |
| Submission type | <input type="checkbox"/> INDEL | or | <input checked="" type="checkbox"/> SV |
|                 |                                | or | <input type="checkbox"/> SNV           |
|                 | (Only choose one)              |    |                                        |

---

**1. Read alignment. Did you use the BAM files provided?**

Yes       No (Specify your aligner below)

|                               |         |
|-------------------------------|---------|
| Aligner                       | Version |
| Command lines with parameters |         |

---

**2. Pre-processing steps to calibrate the BAM files. (Command lines and parameters)**

None

---

**3. Mutation calling algorithm.**

|                               |                                                                                                                                                                                                                                                                                                                                                            |         |                                           |
|-------------------------------|------------------------------------------------------------------------------------------------------------------------------------------------------------------------------------------------------------------------------------------------------------------------------------------------------------------------------------------------------------|---------|-------------------------------------------|
| Algorithm name                | Delly                                                                                                                                                                                                                                                                                                                                                      | Version | IS1: v0.3.2<br>IS2: v0.3.3<br>IS3: v0.5.3 |
| Command lines with parameters | <pre>./delly -t DEL -s 9 -o tumor.DEL.pe.vcf -x human.hg19.excl.tsv tumor.bam normal.bam ./delly -t DUP -s 9 -o tumor.DUP.pe.vcf -x human.hg19.excl.tsv tumor.bam normal.bam ./delly -t INV -s 9 -o tumor.INV.pe.vcf -x human.hg19.excl.tsv tumor.bam normal.bam ./delly -t TRA -s 9 -o tumor.TRA.pe.vcf -x human.hg19.excl.tsv tumor.bam normal.bam</pre> |         |                                           |

Thresholds not indicated by command line

Reference ( check if unpublished  )

Tobias Rausch, Thomas Zichner, Andreas Schlattl, Adrian M. Stuetz, Vladimir Benes, Jan O. Korb. DELLY: structural variant discovery by integrated paired-end and split-read analysis. *Bioinformatics* 2012 28: i333-i339.

---

---

#### 4. Post-VCF filtering steps. (Command lines and parameters)

Delly calls somatic and germline structural variants. Hence, we post-filtered the raw VCF for somatic variants using a custom python script available in the Delly distribution: <https://github.com/tobiasrausch/delly>

```
python ./somaticFilter.py -v tumor.DEL.pe.vcf -o tumor.somatic.DEL.vcf -t DEL -m 400 -a 0.05 -r 0.5 -f
python ./somaticFilter.py -v tumor.DUP.pe.vcf -o tumor.somatic.DUP.vcf -t DUP -m 400 -a 0.05 -r 0.5 -f
python ./somaticFilter.py -v tumor.INV.pe.vcf -o tumor.somatic.INV.vcf -t INV -m 400 -a 0.05 -r 0.5 -f
python ./somaticFilter.py -v tumor.TRA.pe.vcf -o tumor.somatic.TRA.vcf -t TRA -m 0 -a 0.05 -r 0.5 -f
```

We iteratively used the above commands with different cutoffs for the minimum variant allele frequency '-a' and the minimum SV length '-m'. A subset of low confident calls was manually inspected using a read-depth profile and IGV (<http://www.broadinstitute.org/igv/>) to define suitable somatic filtering parameters.

---

---

#### 5. (Optional) Any other comments or steps not covered.

## ICGC-TCGA DREAM Somatic Mutation Calling Challenge Submission Documentation Form

|                 |                                                                                                                            |
|-----------------|----------------------------------------------------------------------------------------------------------------------------|
| Submission name | novoBreak                                                                                                                  |
| Team            | Ken_Chen_Lab                                                                                                               |
| Submission type | <input type="checkbox"/> INDEL or <input checked="" type="checkbox"/> SV or <input type="checkbox"/> SNV (Only choose one) |

### 1. Read alignment. Did you use the BAM files provided?

Yes  No (Specify your aligner below)

Aligner

Version

Command lines with parameters

### 2. Pre-processing steps to calibrate the BAM files. (Command lines and parameters)

```
java -jar picard.jar SamToFastq I=synthetic.challenge.set1.tumor.v2.bam  
F=read1.fq F2=read2.fq  
java -jar picard.jar SamToFastq I=synthetic.challenge.set1.normal.v2.bam  
F=read1.fq F2=read2.fq
```

### 3. Mutation calling algorithm.

Algorithm name

novoBreak

Version

v1.02

Command lines with parameters

```
novobreak $tumor_pair1 $tumor_pair2 $normal_pair1  
$normal_pair2 -r $ref -m3 -o kmer.stat -k 31  
bwa mem -t8 -M $ref somatic_novo_kmer_read1.fq  
somatic_novo_kmer_read2.fq > somaticreads.sam  
  
perl group_bp_reads.pl kmer.stat  
somatic_novo_kmer_read1.fq somatic_novo_kmer_read2.fq  
somaticreads.sam > bp_reads.txt  
  
perl run_ssake.pl bp_reads.txt > /dev/null  
bwa mem -t8 -M $ref ssake.fa > ssake.sam  
perl infer_sv.pl ssake.sam > ssake.vcf
```

Thresholds not indicated by command line

Reference ( check if unpublished  )

Li, Heng. "Aligning sequence reads, clone sequences and assembly contigs with BWA-MEM." arXiv preprint arXiv:1303.3997 (2013). Warren, René L., et al. "Assembling millions of short DNA sequences using SSAKE." *Bioinformatics* 23.4 (2007): 500-501.

---

---

4. Post-VCF filtering steps. (Command lines and parameters)

We used some naive filter, like mapping quality, SV size.

---

---

5. (Optional) Any other comments or steps not covered.

---

---

## ICGC-TCGA DREAM Somatic Mutation Calling Challenge Submission Documentation Form

|                 |                                                                                                                            |
|-----------------|----------------------------------------------------------------------------------------------------------------------------|
| Submission name | novoBreak                                                                                                                  |
| Team            | Ken_Chen_Lab                                                                                                               |
| Submission type | <input type="checkbox"/> INDEL or <input checked="" type="checkbox"/> SV or <input type="checkbox"/> SNV (Only choose one) |

### 1. Read alignment. Did you use the BAM files provided?

Yes  No (Specify your aligner below)

|                               |         |
|-------------------------------|---------|
| Aligner                       | Version |
| Command lines with parameters |         |

### 2. Pre-processing steps to calibrate the BAM files. (Command lines and parameters)

```
java -jar picard.jar SamToFastq I=synthetic.challenge.set2.tumor.bam F=read1.fq  
F2=read2.fq  
java -jar picard.jar SamToFastq I=synthetic.challenge.set2.normal.bam F=read1.fq  
F2=read2.fq
```

### 3. Mutation calling algorithm.

|                               |                                                                                                                                                                                                                                                                                                                                                                                                                                                                                                                              |         |       |
|-------------------------------|------------------------------------------------------------------------------------------------------------------------------------------------------------------------------------------------------------------------------------------------------------------------------------------------------------------------------------------------------------------------------------------------------------------------------------------------------------------------------------------------------------------------------|---------|-------|
| Algorithm name                | novoBreak                                                                                                                                                                                                                                                                                                                                                                                                                                                                                                                    | Version | v1.03 |
| Command lines with parameters | <pre>novobreak \$tumor_pair1 \$tumor_pair2 \$normal_pair1<br/>\$normal_pair2 -r \$ref -m3 -o kmer.stat -k 31<br/>bwa mem -t8 -M \$ref somatic_novo_kmer_read1.fq<br/>somatic_novo_kmer_read2.fq &gt; somaticreads.sam<br/><br/>perl group_bp_reads.pl kmer.stat<br/>somatic_novo_kmer_read1.fq somatic_novo_kmer_read2.fq<br/>somaticreads.sam &gt; bp_reads.txt<br/><br/>perl run_ssake.pl bp_reads.txt &gt; /dev/null<br/>bwa mem -t8 -M \$ref ssake.fa &gt; ssake.sam<br/>perl infer_sv.pl ssake.sam &gt; ssake.vcf</pre> |         |       |



Thresholds not indicated by command line

Reference ( check if unpublished  )

Li, Heng. "Aligning sequence reads, clone sequences and assembly contigs with BWA-MEM." arXiv preprint arXiv:1303.3997 (2013). Warren, René L., et al. "Assembling millions of short DNA sequences using SSAKE." *Bioinformatics* 23.4 (2007): 500-501.

---

---

#### 4. Post-VCF filtering steps. (Command lines and parameters)

```
perl select_pass.pl ssake.vcf > ssake.pass.vcf
perl infer_bp.pl ssake.pass.vcf $tumor_bam $normal_bam > nbasm.pass.sp.vcf
perl filter_sv.pl nbasm.pass.sp.vcf > novoBreak.pass.flt.vcf
```

---

---

#### 5. (Optional) Any other comments or steps not covered.

---

---

## ICGC-TCGA DREAM Somatic Mutation Calling Challenge Submission Documentation Form

|                 |                                                                                                                            |
|-----------------|----------------------------------------------------------------------------------------------------------------------------|
| Submission name | novoBreak                                                                                                                  |
| Team            | Ken_Chen_Lab                                                                                                               |
| Submission type | <input type="checkbox"/> INDEL or <input checked="" type="checkbox"/> SV or <input type="checkbox"/> SNV (Only choose one) |

### 1. Read alignment. Did you use the BAM files provided?

Yes  No (Specify your aligner below)

|                               |         |
|-------------------------------|---------|
| Aligner                       | Version |
| Command lines with parameters |         |

### 2. Pre-processing steps to calibrate the BAM files. (Command lines and parameters)

```
java -jar picard.jar SamToFastq I=synthetic.challenge.set3.tumor.bam F=read1.fq  
F2=read2.fq  
java -jar picard.jar SamToFastq I=synthetic.challenge.set3.normal.bam F=read1.fq  
F2=read2.fq
```

### 3. Mutation calling algorithm.

|                               |                                                                                                                                                                                                                                                                                                                                                                                                                                                                                                                              |         |       |
|-------------------------------|------------------------------------------------------------------------------------------------------------------------------------------------------------------------------------------------------------------------------------------------------------------------------------------------------------------------------------------------------------------------------------------------------------------------------------------------------------------------------------------------------------------------------|---------|-------|
| Algorithm name                | novoBreak                                                                                                                                                                                                                                                                                                                                                                                                                                                                                                                    | Version | v1.04 |
| Command lines with parameters | <pre>novobreak \$tumor_pair1 \$tumor_pair2 \$normal_pair1<br/>\$normal_pair2 -r \$ref -m3 -o kmer.stat -k 31<br/>bwa mem -t8 -M \$ref somatic_novo_kmer_read1.fq<br/>somatic_novo_kmer_read2.fq &gt; somaticreads.sam<br/><br/>perl group_bp_reads.pl kmer.stat<br/>somatic_novo_kmer_read1.fq somatic_novo_kmer_read2.fq<br/>somaticreads.sam &gt; bp_reads.txt<br/><br/>perl run_ssake.pl bp_reads.txt &gt; /dev/null<br/>bwa mem -t8 -M \$ref ssake.fa &gt; ssake.sam<br/>perl infer_sv.pl ssake.sam &gt; ssake.vcf</pre> |         |       |

Thresholds not indicated by command line

Reference ( check if unpublished  )

Li, Heng. "Aligning sequence reads, clone sequences and assembly contigs with BWA-MEM." arXiv preprint arXiv:1303.3997 (2013). Warren, René L., et al. "Assembling millions of short DNA sequences using SSAKE." *Bioinformatics* 23.4 (2007): 500-501.

---

---

#### 4. Post-VCF filtering steps. (Command lines and parameters)

```
perl select_pass.pl ssake.vcf > ssake.pass.vcf
perl infer_bp.pl ssake.pass.vcf $tumor_bam $normal_bam > nbasm.pass.sp.vcf
perl filter_sv.pl nbasm.pass.sp.vcf > novoBreak.pass.flt.vcf
```

---

---

#### 5. (Optional) Any other comments or steps not covered.

---

---

## ICGC-TCGA DREAM Somatic Mutation Calling Challenge Submission Documentation Form

|                                                                                                  |                                                                                                                            |
|--------------------------------------------------------------------------------------------------|----------------------------------------------------------------------------------------------------------------------------|
| Submission name                                                                                  | Manta_sens5 (synthetic_1 ID: 2350297)                                                                                      |
| Team                                                                                             | MantaStrelka                                                                                                               |
| Submission type                                                                                  | <input type="checkbox"/> INDEL or <input checked="" type="checkbox"/> SV or <input type="checkbox"/> SNV (Only choose one) |
| 1. Read alignment. Did you use the BAM files provided?                                           |                                                                                                                            |
| <input checked="" type="checkbox"/> Yes <input type="checkbox"/> No (Specify your aligner below) |                                                                                                                            |
| Aligner                                                                                          | Version                                                                                                                    |
| Command lines with parameters                                                                    |                                                                                                                            |
| 2. Pre-processing steps to calibrate the BAM files. (Command lines and parameters)               |                                                                                                                            |

|                                |                                                                                                                                                                                                                                                                                                                                                                                                                                                                                           |
|--------------------------------|-------------------------------------------------------------------------------------------------------------------------------------------------------------------------------------------------------------------------------------------------------------------------------------------------------------------------------------------------------------------------------------------------------------------------------------------------------------------------------------------|
| 3. Mutation calling algorithm. |                                                                                                                                                                                                                                                                                                                                                                                                                                                                                           |
| Algorithm name                 | Manta Version v0.18.0-7-ge843cb3                                                                                                                                                                                                                                                                                                                                                                                                                                                          |
| Command lines with parameters  | <pre>/home/csaunders/devel/manta/install/bin/configManta.py --referenceFasta=/bioinfoSD/smc-dream/ref/Homo_sapiens _assembly19.fasta --normalBam synth_set1/ae16ceb3-ce31-4648- 840c-66f3c5d180a6/synthetic.challenge.set1.normal.v2.bam --tumorBam synth_set1/06683320-dbd9-464e-b 6f2-143e715b2981/synthetic.challenge.set1.tumor.v2.bam --runDir=mantaSynthSet1_sens5 &amp;&amp; \ /bioinfoSD/users/csaunders/smc- dream/synth1/mantaSynthSet1_sens5/runWorkflow.py -m sge -j 64</pre> |

Thresholds not indicated by command line

In the manta global parameter file “configManta.py.ini” the minimum quality scored variant size was changed from the default:  
minScoredVariantSize = 51

to:  
minScoredVariantSize = 100

...so as to agree with the minimum size variant described in the DREAM simulation data.

Reference ( check if unpublished  )

Chen X, Schulz-Trieglaff O, Shaw R, Barnes B, Schlesinger F, Källberg M, Cox AJ, Kruglyak S, Saunders CT. Manta: rapid detection of structural variants and indels for germline and cancer sequencing applications. *Bioinformatics*. 2016;32:1220-2.

---

---

#### 4. Post-VCF filtering steps. (Command lines and parameters)

---

---

```
# (1) awk filter for PASS'd variants only
#
# (2) inversionFilter.py script condenses inversions from manta's default
# 1-record per-breakend format to the single-record per inversion
# format presumably expected by the DREAM SCM scoring script.
# This script is also part of v0.18.0-7-ge843cb3 code distribution.
#
gzip -dc ${MANTA_RUN_DIR}/results/variants/somaticSV.vcf.gz | \
awk '/^#/ || ($7=="PASS")' | \
${MANTA_CLONE_DIR}/scratch/util/inversionFilter.py | \
bgzip -c >| \
somaticSV.sens5.pass.vcf.gz
```

---

---

#### 5. (Optional) Any other comments or steps not covered.

---

---

**ICGC-TCGA DREAM Somatic Mutation Calling Challenge  
Submission Documentation Form**

|                                                                                                  |                                                                                                                            |                |                     |
|--------------------------------------------------------------------------------------------------|----------------------------------------------------------------------------------------------------------------------------|----------------|---------------------|
| <b>Submission name</b>                                                                           | Manta_v20b (synthetic_2 ID: 2385728)                                                                                       |                |                     |
| <b>Team</b>                                                                                      | MantaStrelka                                                                                                               |                |                     |
| <b>Submission type</b>                                                                           | <input type="checkbox"/> INDEL or <input checked="" type="checkbox"/> SV or <input type="checkbox"/> SNV (Only choose one) |                |                     |
| <b>1. Read alignment. Did you use the BAM files provided?</b>                                    |                                                                                                                            |                |                     |
| <input checked="" type="checkbox"/> Yes <input type="checkbox"/> No (Specify your aligner below) |                                                                                                                            |                |                     |
| <b>Aligner</b>                                                                                   | <b>Version</b>                                                                                                             |                |                     |
| <b>Command lines with parameters</b>                                                             |                                                                                                                            |                |                     |
| <b>2. Pre-processing steps to calibrate the BAM files. (Command lines and parameters)</b>        |                                                                                                                            |                |                     |
|                                                                                                  |                                                                                                                            |                |                     |
| <b>3. Mutation calling algorithm.</b>                                                            |                                                                                                                            |                |                     |
| <b>Algorithm name</b>                                                                            | Manta                                                                                                                      | <b>Version</b> | v0.19.0-63-ga22d8e2 |

Command lines with parameter

```

/home/csaunders/devel/manta-135/install/bin/configManta.py
--referenceFasta /illumina/scratch/TUNE/data/references/broad_assembly19/Homo_sapiens_assembly19.fasta --normalBam
/illumina/scratch/TUNE/data/DREAM_SMC/synth2/orig_bams/865fa3d6-2024-47cf-bf66-c258f8c0efcf/synthetic.challenge.set2.normal.bam --tumorBam
/illumina/scratch/TUNE/data/DREAM_SMC/synth2/orig_bams/7cf8416e-6055-4a0e-86ee-b719db9fbc16/synthetic.challenge.set2.tumor.bam
--runDir=/illumina/scratch/TUNE/shortterm/manta_test/m135_test/synth2/m135_synth2_v5 && \
/illumina/scratch/TUNE/shortterm/manta_test/m135_test/synth2/m135_synth2_v5/runWorkflow.py -m local -j 12

```

Thresholds not indicated by command line

In the manta global parameter file “configManta.py.ini” the minimum quality scored variant size was changed from the default:

```

minScoredVariantSize = 51

```

to:

```

minScoredVariantSize = 100

```

...so as to agree with the minimum size variant described in the DREAM simulation data.

Reference ( check if unpublished  )

Chen X, Schulz-Trieglaff O, Shaw R, Barnes B, Schlesinger F, Källberg M, Cox AJ, Kruglyak S, Saunders CT. Manta: rapid detection of structural variants and indels for germline and cancer sequencing applications. *Bioinformatics*. 2016;32:1220-2.

#### 4. Post-VCF filtering steps. (Command lines and parameters)

```

# (1) awk filter for PASS'd variants only
#
# (2) inversionFilter.py script condenses inversions from manta's default
# 1-record per-breakend format to the single-record per inversion
# format presumably expected by the DREAM SCM scoring script.
#
# (3) largeIntrachromFilter.py script removes all intra-chromosomal translocations above
# 100kb. This step was added in response to the DREAM SCM scoring script which
# significantly penalized manta results in IS1 as the result of a single large intra-chromosomal
# call.
#
# (4) overlapFilter.py script removes the larger of any overlapping PASS'd SV calls (except
# translocations)
#

```

---

---

# Scripts (2), (3) and (4) are also part of v0.19.0-63-ga22d8e2 code distribution.

```
script_dir=${MANTA_CLONE_DIR}/scratch/util
gzip -dc ${MANTA_RUN_DIR}/results/variants/somaticSV.vcf.gz |\
awk '/^#/ || /PASS/' |\
$script_dir/inversionFilter.py |\
$script_dir/largeIntrachromFilter.py --maxSize 100000 |\
$script_dir/overlapFilter.py |\
bgzip -c >|\
somaticSV.c.filter2.vcf.gz
```

---

---

5. (Optional) Any other comments or steps not covered.

---

---



## ICGC-TCGA DREAM Somatic Mutation Calling Challenge Submission Documentation Form

|                                                                                                  |                                                                                                                            |         |                     |
|--------------------------------------------------------------------------------------------------|----------------------------------------------------------------------------------------------------------------------------|---------|---------------------|
| Submission name                                                                                  | Manta_sv (synthetic_3 ID: 2478162)                                                                                         |         |                     |
| Team                                                                                             | MantaStrelka                                                                                                               |         |                     |
| Submission type                                                                                  | <input type="checkbox"/> INDEL or <input checked="" type="checkbox"/> SV or <input type="checkbox"/> SNV (Only choose one) |         |                     |
| 1. Read alignment. Did you use the BAM files provided?                                           |                                                                                                                            |         |                     |
| <input checked="" type="checkbox"/> Yes <input type="checkbox"/> No (Specify your aligner below) |                                                                                                                            |         |                     |
| Aligner                                                                                          | Version                                                                                                                    |         |                     |
| Command lines with parameters                                                                    |                                                                                                                            |         |                     |
| 2. Pre-processing steps to calibrate the BAM files. (Command lines and parameters)               |                                                                                                                            |         |                     |
| 3. Mutation calling algorithm.                                                                   |                                                                                                                            |         |                     |
| Algorithm name                                                                                   | Manta                                                                                                                      | Version | v0.21.0-63-g892f0c5 |

|                                                            |                                                                                                                                                                                                                                                                                                                                                                                                                                                                                                                                                                                                                                         |
|------------------------------------------------------------|-----------------------------------------------------------------------------------------------------------------------------------------------------------------------------------------------------------------------------------------------------------------------------------------------------------------------------------------------------------------------------------------------------------------------------------------------------------------------------------------------------------------------------------------------------------------------------------------------------------------------------------------|
| Command lines with parameters                              | <pre> /home/csaunders/devel/manta-169/install2/bin/configManta.py --referenceFasta /illumina/scratch/TUNE/data/references/broad_assembly19/Homo_sapiens_assembly19 .fasta --normalBam /illumina/scratch/TUNE/data/DREAM_SMC/synth3/orig_bams/b19d76a0-a487-4c50- 8f9c-3b4d5e53239d/synthetic.challenge.set3.normal.bam --tumorBam /illumina/scratch/TUNE/data/DREAM_SMC/synth3/orig_bams/8fe6fc33-2daf-4393-929f- 7c3493d04bef/synthetic.challenge.set3.tumor.bam --runDir=m169_synth3_both_v7 &amp;&amp; \ / illumina/scratch/TUNE/shortterm/manta_test/m168_dream_test/synth3/m169_s ynth3_both_v7/runWorkflow.py -m sge -j 64 </pre> |
| Thresholds not indicated by command line                   | <p>In the manta global parameter file “configManta.py.ini” the minimum quality scored variant size was changed from the default:</p> <pre>minScoredVariantSize = 51</pre> <p>to:</p> <pre>minScoredVariantSize = 100</pre> <p>...so as to agree with the minimum size variant described in the DREAM simulation data.</p>                                                                                                                                                                                                                                                                                                               |
| Reference (check if unpublished <input type="checkbox"/> ) | <p>Chen X, Schulz-Trieglaff O, Shaw R, Barnes B, Schlesinger F, Källberg M, Cox AJ, Kruglyak S, Saunders CT. Manta: rapid detection of structural variants and indels for germline and cancer sequencing applications. <i>Bioinformatics</i>. 2016;32:1220-2.</p>                                                                                                                                                                                                                                                                                                                                                                       |

---

#### 4. Post-VCF filtering steps. (Command lines and parameters)

---

```

# (1) reFilterVcf.py script changes default filtration level to filter calls with SOMATICSCORE
less than 10 (default is less than 30)
#
# (2) minSVSizeFilter.py script removes SV/indel calls of size 100 or less
#
# (3) awk filter for PASS'd variants only
#
# (4) inversionFilter.py script condenses inversions from manta's default
# 1-record per-breakend format to the single-record per inversion
# format presumably expected by the DREAM SCM scoring script.
#
# (5) largeIntrachromFilter.py script removes all intra-chromosomal translocations above
# 100kb. This step was added in response to the DREAM SCM scoring script which

```

---

---

---

```
# significantly penalized manta results in IS1 as the result of a single large intra-chromosomal  
# call.  
#  
# (6) overlapFilter.py script removes the larger of any overlapping PASS'd SV calls (except  
# translocations)  
#  
# (7) pairSupportFilter.py script removes calls with only one supporting paired read in the  
# normal sample when SOMATICSCORE is less than or equal to 20  
#  
# All scripts are also part of v0.21.0-63-g892f0c5 code distribution.
```

```
script_dir=${MANTA_CLONE_DIR}/scratch/util  
gzip -dc ${MANTA_RUN_DIR}/results/variants/somaticSV.vcf.gz |\n${script_dir}/reFilterVcf.py --minSS 10 |\n${script_dir}/minSVSizeFilter.py --minSize 100 |\nawk '/^#/ || /PASS/' |\n${script_dir}/inversionFilter.py |\n${script_dir}/largeIntrachromFilter.py --maxSize 100000 |\n${script_dir}/overlapFilter.py |\n${script_dir}/pairSupportFilter.py |\nbgzip -c >|\nv7_somaticSV.gt100.filtered.q10.vcf.gz
```

---

---

5. (Optional) Any other comments or steps not covered.

---

---

## ICGC-TCGA DREAM Somatic Mutation Calling Challenge Submission Documentation Form

|                        |                                         |                   |                                        |
|------------------------|-----------------------------------------|-------------------|----------------------------------------|
| <b>Submission name</b> | GROMX1 (2385706, synthetic challenge 2) |                   |                                        |
| <b>Team</b>            | Grigoriev-lab                           |                   |                                        |
| <b>Submission type</b> | <input type="checkbox"/> INDEL          | or                | <input checked="" type="checkbox"/> SV |
|                        | <input type="checkbox"/> SNV            | (Only choose one) |                                        |

---

**1. Read alignment. Did you use the BAM files provided?**

Yes       No (Specify your aligner below)

|                                      |                                                                                                                                                                          |                |       |
|--------------------------------------|--------------------------------------------------------------------------------------------------------------------------------------------------------------------------|----------------|-------|
| <b>Aligner</b>                       | BWA                                                                                                                                                                      | <b>Version</b> | 0.7.4 |
| <b>Command lines with parameters</b> | <pre>bwa mem -t 32 ./hg19.fa ./synthetic.challenge.set2.normal.1.fastq ./ synthetic.challenge.set2.normal.2.fastq &gt; synthetic.challenge.set2.normal.bwa_mem.sam</pre> |                |       |

---

**2. Pre-processing steps to calibrate the BAM files. (Command lines and parameters)**

- 1) `samtools view -bS -h synthetic.challenge.set2.normal.bwa_mem.sam > synthetic.challenge.set2.normal.bwa_mem.bam`
- 2) `samtools sort synthetic.challenge.set2.normal.bwa_mem.bam synthetic.challenge.set2.normal.bwa_mem_sorted`
- 3) `samtools index synthetic.challenge.set2.normal.bwa_mem_sorted.bam`
- 4) `samtools rmdup synthetic.challenge.set2.normal.bwa_mem_sorted.bam synthetic.challenge.set2.normal.bwa_mem_sorted_rmdup.bam`
- 5) `samtools index synthetic.challenge.set2.normal.bwa_mem_sorted_rmdup.bam`

---

**3. Mutation calling algorithm.**

|                                      |                                                                                                                                                                                                                                                                                                                 |                |        |
|--------------------------------------|-----------------------------------------------------------------------------------------------------------------------------------------------------------------------------------------------------------------------------------------------------------------------------------------------------------------|----------------|--------|
| <b>Algorithm name</b>                | GROM                                                                                                                                                                                                                                                                                                            | <b>Version</b> | 0.0.83 |
| <b>Command lines with parameters</b> | <pre>python GROM.py -i synthetic.challenge.set2.normal.bwa_mem_sorted _rmdup.bam -r hg19.fa -o synthetic2_normal_GROM_0_0_83_q35_bwa_mem.txt -p 2 -q 35  python GROM.py -i synthetic.challenge.set2.tumor.bwa_mem _sorted_rmdup.bam -r hg19.fa -o synthetic2_tumor_GROM_0_0_83_q35_bwa_mem.txt -p 2 -q 35</pre> |                |        |

Thresholds not indicated by command line

Reference  
( check if unpublished  )

---

---

#### 4. Post-VCF filtering steps. (Command lines and parameters)

```
python vcf_parser20.py -d 35 -u 18 -i 13 -n  
synthetic2_normal_GROM_0_0_83_q35_bwa_mem.txt -t  
synthetic2_tumor_GROM_0_0_83_q35_bwa_mem.txt
```

---

---

#### 5. (Optional) Any other comments or steps not covered.

For `vcf_parser` (4. Post-VCF filtering steps), `-d -u -i` are thresholds for deletions, duplications, and inversions, respectively, where a higher value is more stringent.

---

---

## ICGC-TCGA DREAM Somatic Mutation Calling Challenge Submission Documentation Form

|                 |                                                                                                                            |
|-----------------|----------------------------------------------------------------------------------------------------------------------------|
| Submission name | GROMX1A (2385713, synthetic challenge 2)                                                                                   |
| Team            | Grigoriev-lab                                                                                                              |
| Submission type | <input type="checkbox"/> INDEL or <input checked="" type="checkbox"/> SV or <input type="checkbox"/> SNV (Only choose one) |

### 1. Read alignment. Did you use the BAM files provided?

Yes  No (Specify your aligner below)

|                               |                                                                                                                                                                                      |         |       |
|-------------------------------|--------------------------------------------------------------------------------------------------------------------------------------------------------------------------------------|---------|-------|
| Aligner                       | BWA                                                                                                                                                                                  | Version | 0.7.4 |
| Command lines with parameters | <pre>bwa mem -t 32 ./hg19.fa<br/>./synthetic.challenge.set2.normal.1.fastq ./<br/>synthetic.challenge.set2.normal.2.fastq &gt;<br/>synthetic.challenge.set2.normal.bwa_mem.sam</pre> |         |       |

### 2. Pre-processing steps to calibrate the BAM files. (Command lines and parameters)

- 1) `samtools view -bS -h synthetic.challenge.set2.normal.bwa_mem.sam > synthetic.challenge.set2.normal.bwa_mem.bam`
- 2) `samtools sort synthetic.challenge.set2.normal.bwa_mem.bam synthetic.challenge.set2.normal.bwa_mem_sorted`
- 3) `samtools index synthetic.challenge.set2.normal.bwa_mem_sorted.bam`
- 4) `samtools rmdup synthetic.challenge.set2.normal.bwa_mem_sorted.bam synthetic.challenge.set2.normal.bwa_mem_sorted_rmdup.bam`
- 5) `samtools index synthetic.challenge.set2.normal.bwa_mem_sorted_rmdup.bam`

### 3. Mutation calling algorithm.

|                               |                                                                                                                                                                                                                                                                                                                                                           |         |        |
|-------------------------------|-----------------------------------------------------------------------------------------------------------------------------------------------------------------------------------------------------------------------------------------------------------------------------------------------------------------------------------------------------------|---------|--------|
| Algorithm name                | GROM                                                                                                                                                                                                                                                                                                                                                      | Version | 0.0.83 |
| Command lines with parameters | <pre>python GROM.py -i<br/>synthetic.challenge.set2.normal.bwa_mem_sorted<br/>_rmdup.bam -r hg19.fa -o<br/>synthetic2_normal_GROM_0_0_83_q35_bwa_mem.txt -p 2 -q<br/>35 -e<br/><br/>python GROM.py -i synthetic.challenge.set2.tumor.bwa_mem<br/>_sorted_rmdup.bam -r hg19.fa -o<br/>synthetic2_tumor_GROM_0_0_83_q35_bwa_mem.txt -p 2 -q<br/>35 -e</pre> |         |        |

Thresholds not indicated by command line

Reference ( check if unpublished  )

---

---

#### 4. Post-VCF filtering steps. (Command lines and parameters)

```
python vcf_parser20.py -d 35 -u 18 -i 13 -n  
synthetic2_normal_GROM_0_0_83_q35_bwa_mem.txt -t  
synthetic2_tumor_GROM_0_0_83_q35_bwa_mem.txt
```

---

---

#### 5. (Optional) Any other comments or steps not covered.

For `vcf_parser` (4. Post-VCF filtering steps), `-d -u -i` are thresholds for deletions, duplications, and inversions, respectively, where a higher value is more stringent.

---

---

## ICGC-TCGA DREAM Somatic Mutation Calling Challenge Submission Documentation Form

|                        |                                         |                   |                                        |
|------------------------|-----------------------------------------|-------------------|----------------------------------------|
| <b>Submission name</b> | GROMX2 (2385707, synthetic challenge 2) |                   |                                        |
| <b>Team</b>            | Grigoriev-lab                           |                   |                                        |
| <b>Submission type</b> | <input type="checkbox"/> INDEL          | or                | <input checked="" type="checkbox"/> SV |
|                        | <input type="checkbox"/> SNV            | (Only choose one) |                                        |

---

**1. Read alignment. Did you use the BAM files provided?**

Yes       No (Specify your aligner below)

|                                      |                                                                                                                                                                          |                |       |
|--------------------------------------|--------------------------------------------------------------------------------------------------------------------------------------------------------------------------|----------------|-------|
| <b>Aligner</b>                       | BWA                                                                                                                                                                      | <b>Version</b> | 0.7.4 |
| <b>Command lines with parameters</b> | <pre>bwa mem -t 32 ./hg19.fa ./synthetic.challenge.set2.normal.1.fastq ./ synthetic.challenge.set2.normal.2.fastq &gt; synthetic.challenge.set2.normal.bwa_mem.sam</pre> |                |       |

---

**2. Pre-processing steps to calibrate the BAM files. (Command lines and parameters)**

- 1) `samtools view -bS -h synthetic.challenge.set2.normal.bwa_mem.sam > synthetic.challenge.set2.normal.bwa_mem.bam`
- 2) `samtools sort synthetic.challenge.set2.normal.bwa_mem.bam synthetic.challenge.set2.normal.bwa_mem_sorted`
- 3) `samtools index synthetic.challenge.set2.normal.bwa_mem_sorted.bam`
- 4) `samtools rmdup synthetic.challenge.set2.normal.bwa_mem_sorted.bam synthetic.challenge.set2.normal.bwa_mem_sorted_rmdup.bam`
- 5) `samtools index synthetic.challenge.set2.normal.bwa_mem_sorted_rmdup.bam`

---

**3. Mutation calling algorithm.**

|                                      |                                                                                                                                                                                                                                                                                                                 |                |        |
|--------------------------------------|-----------------------------------------------------------------------------------------------------------------------------------------------------------------------------------------------------------------------------------------------------------------------------------------------------------------|----------------|--------|
| <b>Algorithm name</b>                | GROM                                                                                                                                                                                                                                                                                                            | <b>Version</b> | 0.0.83 |
| <b>Command lines with parameters</b> | <pre>python GROM.py -i synthetic.challenge.set2.normal.bwa_mem_sorted _rmdup.bam -r hg19.fa -o synthetic2_normal_GROM_0_0_83_q35_bwa_mem.txt -p 2 -q 35  python GROM.py -i synthetic.challenge.set2.tumor.bwa_mem _sorted_rmdup.bam -r hg19.fa -o synthetic2_tumor_GROM_0_0_83_q35_bwa_mem.txt -p 2 -q 35</pre> |                |        |



Thresholds not indicated by command line

Reference ( check if unpublished  )

---

---

#### 4. Post-VCF filtering steps. (Command lines and parameters)

```
python vcf_parser20.py -d 41 -u 23 -i 15 -n  
synthetic2_normal_GROM_0_0_83_q35_bwa_mem.txt -t  
synthetic2_tumor_GROM_0_0_83_q35_bwa_mem.txt
```

---

---

#### 5. (Optional) Any other comments or steps not covered.

For `vcf_parser` (4. Post-VCF filtering steps), `-d -u -i` are thresholds for deletions, duplications, and inversions, respectively, where a higher value is more stringent.

---

---

## ICGC-TCGA DREAM Somatic Mutation Calling Challenge Submission Documentation Form

|                        |                                         |                   |                                        |
|------------------------|-----------------------------------------|-------------------|----------------------------------------|
| <b>Submission name</b> | GROMX3 (2385708, synthetic challenge 2) |                   |                                        |
| <b>Team</b>            | Grigoriev-lab                           |                   |                                        |
| <b>Submission type</b> | <input type="checkbox"/> INDEL          | or                | <input checked="" type="checkbox"/> SV |
|                        | <input type="checkbox"/> SNV            | (Only choose one) |                                        |

---

**1. Read alignment. Did you use the BAM files provided?**

Yes       No (Specify your aligner below)

|                                      |                                                                                                                                                                          |                |       |
|--------------------------------------|--------------------------------------------------------------------------------------------------------------------------------------------------------------------------|----------------|-------|
| <b>Aligner</b>                       | BWA                                                                                                                                                                      | <b>Version</b> | 0.7.4 |
| <b>Command lines with parameters</b> | <pre>bwa mem -t 32 ./hg19.fa ./synthetic.challenge.set2.normal.1.fastq ./ synthetic.challenge.set2.normal.2.fastq &gt; synthetic.challenge.set2.normal.bwa_mem.sam</pre> |                |       |

---

**2. Pre-processing steps to calibrate the BAM files. (Command lines and parameters)**

- 1) `samtools view -bS -h synthetic.challenge.set2.normal.bwa_mem.sam > synthetic.challenge.set2.normal.bwa_mem.bam`
- 2) `samtools sort synthetic.challenge.set2.normal.bwa_mem.bam synthetic.challenge.set2.normal.bwa_mem_sorted`
- 3) `samtools index synthetic.challenge.set2.normal.bwa_mem_sorted.bam`
- 4) `samtools rmdup synthetic.challenge.set2.normal.bwa_mem_sorted.bam synthetic.challenge.set2.normal.bwa_mem_sorted_rmdup.bam`
- 5) `samtools index synthetic.challenge.set2.normal.bwa_mem_sorted_rmdup.bam`

---

**3. Mutation calling algorithm.**

|                                      |                                                                                                                                                                                                                                                                                                                 |                |        |
|--------------------------------------|-----------------------------------------------------------------------------------------------------------------------------------------------------------------------------------------------------------------------------------------------------------------------------------------------------------------|----------------|--------|
| <b>Algorithm name</b>                | GROM                                                                                                                                                                                                                                                                                                            | <b>Version</b> | 0.0.83 |
| <b>Command lines with parameters</b> | <pre>python GROM.py -i synthetic.challenge.set2.normal.bwa_mem_sorted _rmdup.bam -r hg19.fa -o synthetic2_normal_GROM_0_0_83_q35_bwa_mem.txt -p 2 -q 35  python GROM.py -i synthetic.challenge.set2.tumor.bwa_mem _sorted_rmdup.bam -r hg19.fa -o synthetic2_tumor_GROM_0_0_83_q35_bwa_mem.txt -p 2 -q 35</pre> |                |        |

Thresholds not indicated by command line

Reference ( check if unpublished  )

---

---

#### 4. Post-VCF filtering steps. (Command lines and parameters)

```
python vcf_parser20.py -d 42 -u 24 -i 16 -n  
synthetic2_normal_GROM_0_0_83_q35_bwa_mem.txt -t  
synthetic2_tumor_GROM_0_0_83_q35_bwa_mem.txt
```

---

---

#### 5. (Optional) Any other comments or steps not covered.

For `vcf_parser` (4. Post-VCF filtering steps), `-d -u -i` are thresholds for deletions, duplications, and inversions, respectively, where a higher value is more stringent.

---

---

## ICGC-TCGA DREAM Somatic Mutation Calling Challenge Submission Documentation Form

|                        |                                         |                   |                                        |
|------------------------|-----------------------------------------|-------------------|----------------------------------------|
| <b>Submission name</b> | GROMX4 (2385709, synthetic challenge 2) |                   |                                        |
| <b>Team</b>            | Grigoriev-lab                           |                   |                                        |
| <b>Submission type</b> | <input type="checkbox"/> INDEL          | or                | <input checked="" type="checkbox"/> SV |
|                        | <input type="checkbox"/> SNV            | (Only choose one) |                                        |

---

**1. Read alignment. Did you use the BAM files provided?**

Yes       No (Specify your aligner below)

|                                      |                                                                                                                                                                          |                |       |
|--------------------------------------|--------------------------------------------------------------------------------------------------------------------------------------------------------------------------|----------------|-------|
| <b>Aligner</b>                       | BWA                                                                                                                                                                      | <b>Version</b> | 0.7.4 |
| <b>Command lines with parameters</b> | <pre>bwa mem -t 32 ./hg19.fa ./synthetic.challenge.set2.normal.1.fastq ./ synthetic.challenge.set2.normal.2.fastq &gt; synthetic.challenge.set2.normal.bwa_mem.sam</pre> |                |       |

---

**2. Pre-processing steps to calibrate the BAM files. (Command lines and parameters)**

- 1) samtools view -bS -h synthetic.challenge.set2.normal.bwa\_mem.sam > synthetic.challenge.set2.normal.bwa\_mem.bam
- 2) samtools sort synthetic.challenge.set2.normal.bwa\_mem.bam synthetic.challenge.set2.normal.bwa\_mem\_sorted
- 3) samtools index synthetic.challenge.set2.normal.bwa\_mem\_sorted.bam
- 4) samtools rmdup synthetic.challenge.set2.normal.bwa\_mem\_sorted.bam synthetic.challenge.set2.normal.bwa\_mem\_sorted\_rmdup.bam
- 5) samtools index synthetic.challenge.set2.normal.bwa\_mem\_sorted\_rmdup.bam

---

**3. Mutation calling algorithm.**

|                                      |                                                                                                                                                                                                                                                                                                                 |                |        |
|--------------------------------------|-----------------------------------------------------------------------------------------------------------------------------------------------------------------------------------------------------------------------------------------------------------------------------------------------------------------|----------------|--------|
| <b>Algorithm name</b>                | GROM                                                                                                                                                                                                                                                                                                            | <b>Version</b> | 0.0.83 |
| <b>Command lines with parameters</b> | <pre>python GROM.py -i synthetic.challenge.set2.normal.bwa_mem_sorted _rmdup.bam -r hg19.fa -o synthetic2_normal_GROM_0_0_83_q35_bwa_mem.txt -p 2 -q 35  python GROM.py -i synthetic.challenge.set2.tumor.bwa_mem _sorted_rmdup.bam -r hg19.fa -o synthetic2_tumor_GROM_0_0_83_q35_bwa_mem.txt -p 2 -q 35</pre> |                |        |

Thresholds not indicated by command line

Reference ( check if unpublished  )

---

---

#### 4. Post-VCF filtering steps. (Command lines and parameters)

```
python vcf_parser20.py -d 45 -u 28 -i 18 -n  
synthetic2_normal_GROM_0_0_83_q35_bwa_mem.txt -t  
synthetic2_tumor_GROM_0_0_83_q35_bwa_mem.txt
```

---

---

#### 5. (Optional) Any other comments or steps not covered.

For `vcf_parser` (4. Post-VCF filtering steps), `-d -u -i` are thresholds for deletions, duplications, and inversions, respectively, where a higher value is more stringent.

---

---

## ICGC-TCGA DREAM Somatic Mutation Calling Challenge Submission Documentation Form

|                 |                                                                                                                            |
|-----------------|----------------------------------------------------------------------------------------------------------------------------|
| Submission name | Syn3_cv1 (2475738, synthetic challenge 3)                                                                                  |
| Team            | Grigoriev-lab                                                                                                              |
| Submission type | <input type="checkbox"/> INDEL or <input checked="" type="checkbox"/> SV or <input type="checkbox"/> SNV (Only choose one) |

### 1. Read alignment. Did you use the BAM files provided?

Yes  No (Specify your aligner below)

|                               |                                                                                                                                                                                      |         |       |
|-------------------------------|--------------------------------------------------------------------------------------------------------------------------------------------------------------------------------------|---------|-------|
| Aligner                       | BWA                                                                                                                                                                                  | Version | 0.7.4 |
| Command lines with parameters | <pre>bwa mem -t 32 ./hg19.fa<br/>./synthetic.challenge.set3.normal.1.fastq ./<br/>synthetic.challenge.set3.normal.2.fastq &gt;<br/>synthetic.challenge.set3.normal.bwa_mem.sam</pre> |         |       |

### 2. Pre-processing steps to calibrate the BAM files. (Command lines and parameters)

- 1) `samtools view -bS -h synthetic.challenge.set3.normal.bwa_mem.sam > synthetic.challenge.set3.normal.bwa_mem.bam`
- 2) `samtools sort synthetic.challenge.set3.normal.bwa_mem.bam synthetic.challenge.set3.normal.bwa_mem_sorted`
- 3) `samtools index synthetic.challenge.set3.normal.bwa_mem_sorted.bam`
- 4) `samtools rmdup synthetic.challenge.set3.normal.bwa_mem_sorted.bam synthetic.challenge.set3.normal.bwa_mem_sorted_rmdup.bam`
- 5) `samtools index synthetic.challenge.set3.normal.bwa_mem_sorted_rmdup.bam`

### 3. Mutation calling algorithm.

|                               |                                                                                                                                                                                                                                                                                                      |         |        |
|-------------------------------|------------------------------------------------------------------------------------------------------------------------------------------------------------------------------------------------------------------------------------------------------------------------------------------------------|---------|--------|
| Algorithm name                | GROM                                                                                                                                                                                                                                                                                                 | Version | 0.0.85 |
| Command lines with parameters | <pre>GROM -i synthetic.challenge.set3.normal.bwa_mem_sorted_rmdup.bam -r hg19.fa -o synthetic3_normal_GROM_0_0_85_q0_bwa_mem.txt -p 2 -q 0</pre><br><pre>GROM -i synthetic.challenge.set3.tumor.bwa_mem_sorted_rmdup.bam -r hg19.fa -o synthetic3_tumor_GROM_0_0_85_q35_bwa_mem.txt -p 2 -q 35</pre> |         |        |

Thresholds not indicated by command line

Reference ( check if unpublished  )

---

---

#### 4. Post-VCF filtering steps. (Command lines and parameters)

```
python vcf_parser32.py -l -g 50-d 17 -u 11 -i 22 -s 27 -n  
synthetic3_normal_GROM_0_0_85_q0_bwa_mem.txt -t  
synthetic3_tumor_GROM_0_0_85_q35_bwa_mem.txt
```

---

---

#### 5. (Optional) Any other comments or steps not covered.

For `vcf_parser` (4. Post-VCF filtering steps), `-d -u -i -s` are thresholds for deletions, duplications, inversions, and insertions, respectively, where a higher value is more stringent.

---

---

## ICGC-TCGA DREAM Somatic Mutation Calling Challenge Submission Documentation Form

|                 |                                                                                                                            |
|-----------------|----------------------------------------------------------------------------------------------------------------------------|
| Submission name | Syn3_V34c_S1 (2476543, synthetic challenge 3)                                                                              |
| Team            | Grigoriev-lab                                                                                                              |
| Submission type | <input type="checkbox"/> INDEL or <input checked="" type="checkbox"/> SV or <input type="checkbox"/> SNV (Only choose one) |

### 1. Read alignment. Did you use the BAM files provided?

Yes  No (Specify your aligner below)

|                               |                                                                                                                                                                                      |         |       |
|-------------------------------|--------------------------------------------------------------------------------------------------------------------------------------------------------------------------------------|---------|-------|
| Aligner                       | BWA                                                                                                                                                                                  | Version | 0.7.4 |
| Command lines with parameters | <pre>bwa mem -t 32 ./hg19.fa<br/>./synthetic.challenge.set3.normal.1.fastq ./<br/>synthetic.challenge.set3.normal.2.fastq &gt;<br/>synthetic.challenge.set3.normal.bwa_mem.sam</pre> |         |       |

### 2. Pre-processing steps to calibrate the BAM files. (Command lines and parameters)

- 1) `samtools view -bS -h synthetic.challenge.set3.normal.bwa_mem.sam > synthetic.challenge.set3.normal.bwa_mem.bam`
- 2) `samtools sort synthetic.challenge.set3.normal.bwa_mem.bam synthetic.challenge.set3.normal.bwa_mem_sorted`
- 3) `samtools index synthetic.challenge.set3.normal.bwa_mem_sorted.bam`
- 4) `samtools rmdup synthetic.challenge.set3.normal.bwa_mem_sorted.bam synthetic.challenge.set3.normal.bwa_mem_sorted_rmdup.bam`
- 5) `samtools index synthetic.challenge.set3.normal.bwa_mem_sorted_rmdup.bam`

### 3. Mutation calling algorithm.

|                               |                                                                                                                                                                                                                                                                                                      |         |        |
|-------------------------------|------------------------------------------------------------------------------------------------------------------------------------------------------------------------------------------------------------------------------------------------------------------------------------------------------|---------|--------|
| Algorithm name                | GROM                                                                                                                                                                                                                                                                                                 | Version | 0.0.85 |
| Command lines with parameters | <pre>GROM -i synthetic.challenge.set3.normal.bwa_mem_sorted_rmdup.bam -r hg19.fa -o synthetic3_normal_GROM_0_0_85_q0_bwa_mem.txt -p 2 -q 0</pre><br><pre>GROM -i synthetic.challenge.set3.tumor.bwa_mem_sorted_rmdup.bam -r hg19.fa -o synthetic3_tumor_GROM_0_0_85_q35_bwa_mem.txt -p 2 -q 35</pre> |         |        |



Thresholds not indicated by command line

Reference ( check if unpublished  )

---

---

#### 4. Post-VCF filtering steps. (Command lines and parameters)

```
python vcf_parser34.py -l -c -d 18 -u 11 -i 21 -s 26 -n  
synthetic3_normal_GROM_0_0_85_q0_bwa_mem.txt -t  
synthetic3_tumor_GROM_0_0_85_q35_bwa_mem.txt
```

---

---

#### 5. (Optional) Any other comments or steps not covered.

For `vcf_parser` (4. Post-VCF filtering steps), `-d -u -i -s` are thresholds for deletions, duplications, inversions, and insertions, respectively, where a higher value is more stringent.

---

---

## ICGC-TCGA DREAM Somatic Mutation Calling Challenge Submission Documentation Form

|                        |                                                                                                                                  |
|------------------------|----------------------------------------------------------------------------------------------------------------------------------|
| <b>Submission name</b> | Syn3_V34c_S2 (2476561, synthetic challenge 3)                                                                                    |
| <b>Team</b>            | Grigoriev-lab                                                                                                                    |
| <b>Submission type</b> | <input type="checkbox"/> INDEL   or <input checked="" type="checkbox"/> SV   or <input type="checkbox"/> SNV   (Only choose one) |

### 1. Read alignment. Did you use the BAM files provided?

Yes      
  No (Specify your aligner below)

|                                      |                                                                                                                                                                          |                |       |
|--------------------------------------|--------------------------------------------------------------------------------------------------------------------------------------------------------------------------|----------------|-------|
| <b>Aligner</b>                       | BWA                                                                                                                                                                      | <b>Version</b> | 0.7.4 |
| <b>Command lines with parameters</b> | <pre>bwa mem -t 32 ./hg19.fa ./synthetic.challenge.set3.normal.1.fastq ./ synthetic.challenge.set3.normal.2.fastq &gt; synthetic.challenge.set3.normal.bwa_mem.sam</pre> |                |       |

### 2. Pre-processing steps to calibrate the BAM files. (Command lines and parameters)

- 1) `samtools view -bS -h synthetic.challenge.set3.normal.bwa_mem.sam > synthetic.challenge.set3.normal.bwa_mem.bam`
- 2) `samtools sort synthetic.challenge.set3.normal.bwa_mem.bam synthetic.challenge.set3.normal.bwa_mem_sorted`
- 3) `samtools index synthetic.challenge.set3.normal.bwa_mem_sorted.bam`
- 4) `samtools rmdup synthetic.challenge.set3.normal.bwa_mem_sorted.bam synthetic.challenge.set3.normal.bwa_mem_sorted_rmdup.bam`
- 5) `samtools index synthetic.challenge.set3.normal.bwa_mem_sorted_rmdup.bam`

### 3. Mutation calling algorithm.

|                                      |                                                                                                                                                                                                                                                                                         |                |        |
|--------------------------------------|-----------------------------------------------------------------------------------------------------------------------------------------------------------------------------------------------------------------------------------------------------------------------------------------|----------------|--------|
| <b>Algorithm name</b>                | GROM                                                                                                                                                                                                                                                                                    | <b>Version</b> | 0.0.85 |
| <b>Command lines with parameters</b> | <pre>GROM -i synthetic.challenge.set3.normal.bwa_mem_sorted_rmdup.bam -r hg19.fa -o synthetic3_normal_GROM_0_0_85_q0_bwa_mem.txt -p 2 -q 0  GROM -i synthetic.challenge.set3.tumor.bwa_mem_sorted_rmdup.bam -r hg19.fa -o synthetic3_tumor_GROM_0_0_85_q35_bwa_mem.txt -p 2 -q 35</pre> |                |        |

Thresholds not indicated by command line

Reference ( check if unpublished  )

---

---

#### 4. Post-VCF filtering steps. (Command lines and parameters)

```
python vcf_parser34.py -l -c -d 13 -u 7 -i 16 -s 12 -n  
synthetic3_normal_GROM_0_0_85_q0_bwa_mem.txt -t  
synthetic3_tumor_GROM_0_0_85_q35_bwa_mem.txt
```

---

---

#### 5. (Optional) Any other comments or steps not covered.

For vcf\_parser (4. Post-VCF filtering steps), -d -u -i -s are thresholds for deletions, duplications, inversions, and insertions, respectively, where a higher value is more stringent.

---

---

## ICGC-TCGA DREAM Somatic Mutation Calling Challenge Submission Documentation Form

|                 |                                               |                   |                                        |
|-----------------|-----------------------------------------------|-------------------|----------------------------------------|
| Submission name | Syn3_V34c_S3 (2476579, synthetic challenge 3) |                   |                                        |
| Team            | Grigoriev-lab                                 |                   |                                        |
| Submission type | <input type="checkbox"/> INDEL                | or                | <input checked="" type="checkbox"/> SV |
|                 | <input type="checkbox"/> SNV                  | (Only choose one) |                                        |

---

1. Read alignment. Did you use the BAM files provided?

Yes       No (Specify your aligner below)

|                               |                                                                                                                                                                          |         |       |
|-------------------------------|--------------------------------------------------------------------------------------------------------------------------------------------------------------------------|---------|-------|
| Aligner                       | BWA                                                                                                                                                                      | Version | 0.7.4 |
| Command lines with parameters | <pre>bwa mem -t 32 ./hg19.fa ./synthetic.challenge.set3.normal.1.fastq ./ synthetic.challenge.set3.normal.2.fastq &gt; synthetic.challenge.set3.normal.bwa_mem.sam</pre> |         |       |

---

2. Pre-processing steps to calibrate the BAM files. (Command lines and parameters)

- 1) `samtools view -bS -h synthetic.challenge.set3.normal.bwa_mem.sam > synthetic.challenge.set3.normal.bwa_mem.bam`
- 2) `samtools sort synthetic.challenge.set3.normal.bwa_mem.bam synthetic.challenge.set3.normal.bwa_mem_sorted`
- 3) `samtools index synthetic.challenge.set3.normal.bwa_mem_sorted.bam`
- 4) `samtools rmdup synthetic.challenge.set3.normal.bwa_mem_sorted.bam synthetic.challenge.set3.normal.bwa_mem_sorted_rmdup.bam`
- 5) `samtools index synthetic.challenge.set3.normal.bwa_mem_sorted_rmdup.bam`

---

3. Mutation calling algorithm.

|                               |                                                                                                                                                                                                                                                                                         |         |        |
|-------------------------------|-----------------------------------------------------------------------------------------------------------------------------------------------------------------------------------------------------------------------------------------------------------------------------------------|---------|--------|
| Algorithm name                | GROM                                                                                                                                                                                                                                                                                    | Version | 0.0.85 |
| Command lines with parameters | <pre>GROM -i synthetic.challenge.set3.normal.bwa_mem_sorted_rmdup.bam -r hg19.fa -o synthetic3_normal_GROM_0_0_85_q0_bwa_mem.txt -p 2 -q 0  GROM -i synthetic.challenge.set3.tumor.bwa_mem_sorted_rmdup.bam -r hg19.fa -o synthetic3_tumor_GROM_0_0_85_q35_bwa_mem.txt -p 2 -q 35</pre> |         |        |

Thresholds not indicated by command line

Reference  
( check if unpublished  )

---

---

#### 4. Post-VCF filtering steps. (Command lines and parameters)

```
python vcf_parser34.py -l -c -d 24 -u 17 -i 26 -s 30 -n  
synthetic3_normal_GROM_0_0_85_q0_bwa_mem.txt -t  
synthetic3_tumor_GROM_0_0_85_q35_bwa_mem.txt
```

---

---

#### 5. (Optional) Any other comments or steps not covered.

For `vcf_parser` (4. Post-VCF filtering steps), `-d -u -i -s` are thresholds for deletions, duplications, inversions, and insertions, respectively, where a higher value is more stringent.

---

---

## ICGC-TCGA DREAM Somatic Mutation Calling Challenge Submission Documentation Form

|                 |                                                                                                                            |
|-----------------|----------------------------------------------------------------------------------------------------------------------------|
| Submission name | Syn3_V37c_S2 (2478182, synthetic challenge 3)                                                                              |
| Team            | Grigoriev-lab                                                                                                              |
| Submission type | <input type="checkbox"/> INDEL or <input checked="" type="checkbox"/> SV or <input type="checkbox"/> SNV (Only choose one) |

### 1. Read alignment. Did you use the BAM files provided?

Yes  No (Specify your aligner below)

|                               |                                                                                                                                                                                      |         |       |
|-------------------------------|--------------------------------------------------------------------------------------------------------------------------------------------------------------------------------------|---------|-------|
| Aligner                       | BWA                                                                                                                                                                                  | Version | 0.7.4 |
| Command lines with parameters | <pre>bwa mem -t 32 ./hg19.fa<br/>./synthetic.challenge.set3.normal.1.fastq ./<br/>synthetic.challenge.set3.normal.2.fastq &gt;<br/>synthetic.challenge.set3.normal.bwa_mem.sam</pre> |         |       |

### 2. Pre-processing steps to calibrate the BAM files. (Command lines and parameters)

- 1) `samtools view -bS -h synthetic.challenge.set3.normal.bwa_mem.sam > synthetic.challenge.set3.normal.bwa_mem.bam`
- 2) `samtools sort synthetic.challenge.set3.normal.bwa_mem.bam synthetic.challenge.set3.normal.bwa_mem_sorted`
- 3) `samtools index synthetic.challenge.set3.normal.bwa_mem_sorted.bam`
- 4) `samtools rmdup synthetic.challenge.set3.normal.bwa_mem_sorted.bam synthetic.challenge.set3.normal.bwa_mem_sorted_rmdup.bam`
- 5) `samtools index synthetic.challenge.set3.normal.bwa_mem_sorted_rmdup.bam`

### 3. Mutation calling algorithm.

|                               |                                                                                                                                                                                                                                                                                                      |         |        |
|-------------------------------|------------------------------------------------------------------------------------------------------------------------------------------------------------------------------------------------------------------------------------------------------------------------------------------------------|---------|--------|
| Algorithm name                | GROM                                                                                                                                                                                                                                                                                                 | Version | 0.0.85 |
| Command lines with parameters | <pre>GROM -i synthetic.challenge.set3.normal.bwa_mem_sorted_rmdup.bam -r hg19.fa -o synthetic3_normal_GROM_0_0_85_q0_bwa_mem.txt -p 2 -q 0</pre><br><pre>GROM -i synthetic.challenge.set3.tumor.bwa_mem_sorted_rmdup.bam -r hg19.fa -o synthetic3_tumor_GROM_0_0_85_q35_bwa_mem.txt -p 2 -q 35</pre> |         |        |

Thresholds not indicated by command line

Reference ( check if unpublished  )

---

---

4. Post-VCF filtering steps. (Command lines and parameters)

```
python vcf_parser37.py -l -c -d 17 -u 12 -i 30 -s 12 -n  
synthetic3_normal_GROM_0_0_85_q0_bwa_mem.txt -t  
synthetic3_tumor_GROM_0_0_85_q35_bwa_mem.txt
```

---

---

5. (Optional) Any other comments or steps not covered.

For `vcf_parser` (4. Post-VCF filtering steps), `-d -u -i -s` are thresholds for deletions, duplications, inversions, and insertions, respectively, where a higher value is more stringent.

---

---

## ICGC-TCGA DREAM Somatic Mutation Calling Challenge Submission Documentation Form

|                 |                                                                                                                                  |
|-----------------|----------------------------------------------------------------------------------------------------------------------------------|
| Submission name | Syn3_V37c_S2.5 (2478148, synthetic challenge 3)                                                                                  |
| Team            | Grigoriev-lab                                                                                                                    |
| Submission type | <input type="checkbox"/> INDEL   or <input checked="" type="checkbox"/> SV   or <input type="checkbox"/> SNV   (Only choose one) |

### 1. Read alignment. Did you use the BAM files provided?

Yes                       No (Specify your aligner below)

|                               |                                                                                                                                                                          |         |       |
|-------------------------------|--------------------------------------------------------------------------------------------------------------------------------------------------------------------------|---------|-------|
| Aligner                       | BWA                                                                                                                                                                      | Version | 0.7.4 |
| Command lines with parameters | <pre>bwa mem -t 32 ./hg19.fa ./synthetic.challenge.set3.normal.1.fastq ./ synthetic.challenge.set3.normal.2.fastq &gt; synthetic.challenge.set3.normal.bwa_mem.sam</pre> |         |       |

### 2. Pre-processing steps to calibrate the BAM files. (Command lines and parameters)

- 1) `samtools view -bS -h synthetic.challenge.set3.normal.bwa_mem.sam > synthetic.challenge.set3.normal.bwa_mem.bam`
- 2) `samtools sort synthetic.challenge.set3.normal.bwa_mem.bam synthetic.challenge.set3.normal.bwa_mem_sorted`
- 3) `samtools index synthetic.challenge.set3.normal.bwa_mem_sorted.bam`
- 4) `samtools rmdup synthetic.challenge.set3.normal.bwa_mem_sorted.bam synthetic.challenge.set3.normal.bwa_mem_sorted_rmdup.bam`
- 5) `samtools index synthetic.challenge.set3.normal.bwa_mem_sorted_rmdup.bam`

### 3. Mutation calling algorithm.

|                               |                                                                                                                                                                                                                                                                                         |         |        |
|-------------------------------|-----------------------------------------------------------------------------------------------------------------------------------------------------------------------------------------------------------------------------------------------------------------------------------------|---------|--------|
| Algorithm name                | GROM                                                                                                                                                                                                                                                                                    | Version | 0.0.85 |
| Command lines with parameters | <pre>GROM -i synthetic.challenge.set3.normal.bwa_mem_sorted_rmdup.bam -r hg19.fa -o synthetic3_normal_GROM_0_0_85_q0_bwa_mem.txt -p 2 -q 0  GROM -i synthetic.challenge.set3.tumor.bwa_mem_sorted_rmdup.bam -r hg19.fa -o synthetic3_tumor_GROM_0_0_85_q35_bwa_mem.txt -p 2 -q 35</pre> |         |        |



Thresholds not indicated by command line

Reference ( check if unpublished  )

---

---

#### 4. Post-VCF filtering steps. (Command lines and parameters)

```
python vcf_parser37.py -l -c -d 15 -u 14 -i 34 -s 21 -n  
synthetic3_normal_GROM_0_0_85_q0_bwa_mem.txt -t  
synthetic3_tumor_GROM_0_0_85_q35_bwa_mem.txt
```

---

---

#### 5. (Optional) Any other comments or steps not covered.

For `vcf_parser` (4. Post-VCF filtering steps), `-d -u -i -s` are thresholds for deletions, duplications, inversions, and insertions, respectively, where a higher value is more stringent.

---

---

## ICGC-TCGA DREAM Somatic Mutation Calling Challenge Submission Documentation Form

|                 |                                                                                                                            |
|-----------------|----------------------------------------------------------------------------------------------------------------------------|
| Submission name | Syn3_V37c_S3 (2478175, synthetic challenge 3)                                                                              |
| Team            | Grigoriev-lab                                                                                                              |
| Submission type | <input type="checkbox"/> INDEL or <input checked="" type="checkbox"/> SV or <input type="checkbox"/> SNV (Only choose one) |

### 1. Read alignment. Did you use the BAM files provided?

Yes  No (Specify your aligner below)

|                               |                                                                                                                                                                                      |         |       |
|-------------------------------|--------------------------------------------------------------------------------------------------------------------------------------------------------------------------------------|---------|-------|
| Aligner                       | BWA                                                                                                                                                                                  | Version | 0.7.4 |
| Command lines with parameters | <pre>bwa mem -t 32 ./hg19.fa<br/>./synthetic.challenge.set3.normal.1.fastq ./<br/>synthetic.challenge.set3.normal.2.fastq &gt;<br/>synthetic.challenge.set3.normal.bwa_mem.sam</pre> |         |       |

### 2. Pre-processing steps to calibrate the BAM files. (Command lines and parameters)

- 1) `samtools view -bS -h synthetic.challenge.set3.normal.bwa_mem.sam > synthetic.challenge.set3.normal.bwa_mem.bam`
- 2) `samtools sort synthetic.challenge.set3.normal.bwa_mem.bam synthetic.challenge.set3.normal.bwa_mem_sorted`
- 3) `samtools index synthetic.challenge.set3.normal.bwa_mem_sorted.bam`
- 4) `samtools rmdup synthetic.challenge.set3.normal.bwa_mem_sorted.bam synthetic.challenge.set3.normal.bwa_mem_sorted_rmdup.bam`
- 5) `samtools index synthetic.challenge.set3.normal.bwa_mem_sorted_rmdup.bam`

### 3. Mutation calling algorithm.

|                               |                                                                                                                                                                                                                                                                                                      |         |        |
|-------------------------------|------------------------------------------------------------------------------------------------------------------------------------------------------------------------------------------------------------------------------------------------------------------------------------------------------|---------|--------|
| Algorithm name                | GROM                                                                                                                                                                                                                                                                                                 | Version | 0.0.85 |
| Command lines with parameters | <pre>GROM -i synthetic.challenge.set3.normal.bwa_mem_sorted_rmdup.bam -r hg19.fa -o synthetic3_normal_GROM_0_0_85_q0_bwa_mem.txt -p 2 -q 0</pre><br><pre>GROM -i synthetic.challenge.set3.tumor.bwa_mem_sorted_rmdup.bam -r hg19.fa -o synthetic3_tumor_GROM_0_0_85_q35_bwa_mem.txt -p 2 -q 35</pre> |         |        |

Thresholds not indicated by command line

Reference ( check if unpublished  )

---

---

4. Post-VCF filtering steps. (Command lines and parameters)

```
python vcf_parser37.py -l -c -d 16 -u 15 -i 35 -s 26 -n  
synthetic3_normal_GROM_0_0_85_q0_bwa_mem.txt -t  
synthetic3_tumor_GROM_0_0_85_q35_bwa_mem.txt
```

---

---

5. (Optional) Any other comments or steps not covered.

For `vcf_parser` (4. Post-VCF filtering steps), `-d -u -i -s` are thresholds for deletions, duplications, inversions, and insertions, respectively, where a higher value is more stringent.

---

---

## ICGC-TCGA DREAM Somatic Mutation Calling Challenge Submission Documentation Form

|                 |                                                                                                                            |
|-----------------|----------------------------------------------------------------------------------------------------------------------------|
| Submission name | Syn3_V37c_S4 (2478176, synthetic challenge 3)                                                                              |
| Team            | Grigoriev-lab                                                                                                              |
| Submission type | <input type="checkbox"/> INDEL or <input checked="" type="checkbox"/> SV or <input type="checkbox"/> SNV (Only choose one) |

### 1. Read alignment. Did you use the BAM files provided?

Yes 
  No (Specify your aligner below)

|                               |                                                                                                                                                                          |         |       |
|-------------------------------|--------------------------------------------------------------------------------------------------------------------------------------------------------------------------|---------|-------|
| Aligner                       | BWA                                                                                                                                                                      | Version | 0.7.4 |
| Command lines with parameters | <pre>bwa mem -t 32 ./hg19.fa ./synthetic.challenge.set3.normal.1.fastq ./ synthetic.challenge.set3.normal.2.fastq &gt; synthetic.challenge.set3.normal.bwa_mem.sam</pre> |         |       |

### 2. Pre-processing steps to calibrate the BAM files. (Command lines and parameters)

- 1) `samtools view -bS -h synthetic.challenge.set3.normal.bwa_mem.sam > synthetic.challenge.set3.normal.bwa_mem.bam`
- 2) `samtools sort synthetic.challenge.set3.normal.bwa_mem.bam synthetic.challenge.set3.normal.bwa_mem_sorted`
- 3) `samtools index synthetic.challenge.set3.normal.bwa_mem_sorted.bam`
- 4) `samtools rmdup synthetic.challenge.set3.normal.bwa_mem_sorted.bam synthetic.challenge.set3.normal.bwa_mem_sorted_rmdup.bam`
- 5) `samtools index synthetic.challenge.set3.normal.bwa_mem_sorted_rmdup.bam`

### 3. Mutation calling algorithm.

|                               |                                                                                                                                                                                                                                                                                         |         |        |
|-------------------------------|-----------------------------------------------------------------------------------------------------------------------------------------------------------------------------------------------------------------------------------------------------------------------------------------|---------|--------|
| Algorithm name                | GROM                                                                                                                                                                                                                                                                                    | Version | 0.0.85 |
| Command lines with parameters | <pre>GROM -i synthetic.challenge.set3.normal.bwa_mem_sorted_rmdup.bam -r hg19.fa -o synthetic3_normal_GROM_0_0_85_q0_bwa_mem.txt -p 2 -q 0  GROM -i synthetic.challenge.set3.tumor.bwa_mem_sorted_rmdup.bam -r hg19.fa -o synthetic3_tumor_GROM_0_0_85_q35_bwa_mem.txt -p 2 -q 35</pre> |         |        |

Thresholds not indicated by command line

Reference ( check if unpublished  )

---

---

#### 4. Post-VCF filtering steps. (Command lines and parameters)

```
python vcf_parser37.py -l -c -d 18 -u 17 -i 38 -s 31 -n  
synthetic3_normal_GROM_0_0_85_q0_bwa_mem.txt -t  
synthetic3_tumor_GROM_0_0_85_q35_bwa_mem.txt
```

---

---

#### 5. (Optional) Any other comments or steps not covered.

For vcf\_parser (4. Post-VCF filtering steps), -d -u -i -s are thresholds for deletions, duplications, inversions, and insertions, respectively, where a higher value is more stringent.

---

---

## ICGC-TCGA DREAM Somatic Mutation Calling Challenge Submission Documentation Form

|                 |                                                                                                                            |
|-----------------|----------------------------------------------------------------------------------------------------------------------------|
| Submission name | Syn3_V37_S1 (2478118, synthetic challenge 3)                                                                               |
| Team            | Grigoriev-lab                                                                                                              |
| Submission type | <input type="checkbox"/> INDEL or <input checked="" type="checkbox"/> SV or <input type="checkbox"/> SNV (Only choose one) |

### 1. Read alignment. Did you use the BAM files provided?

Yes  No (Specify your aligner below)

|                               |                                                                                                                                                                                      |         |       |
|-------------------------------|--------------------------------------------------------------------------------------------------------------------------------------------------------------------------------------|---------|-------|
| Aligner                       | BWA                                                                                                                                                                                  | Version | 0.7.4 |
| Command lines with parameters | <pre>bwa mem -t 32 ./hg19.fa<br/>./synthetic.challenge.set3.normal.1.fastq ./<br/>synthetic.challenge.set3.normal.2.fastq &gt;<br/>synthetic.challenge.set3.normal.bwa_mem.sam</pre> |         |       |

### 2. Pre-processing steps to calibrate the BAM files. (Command lines and parameters)

- 1) `samtools view -bS -h synthetic.challenge.set3.normal.bwa_mem.sam > synthetic.challenge.set3.normal.bwa_mem.bam`
- 2) `samtools sort synthetic.challenge.set3.normal.bwa_mem.bam synthetic.challenge.set3.normal.bwa_mem_sorted`
- 3) `samtools index synthetic.challenge.set3.normal.bwa_mem_sorted.bam`
- 4) `samtools rmdup synthetic.challenge.set3.normal.bwa_mem_sorted.bam synthetic.challenge.set3.normal.bwa_mem_sorted_rmdup.bam`
- 5) `samtools index synthetic.challenge.set3.normal.bwa_mem_sorted_rmdup.bam`

### 3. Mutation calling algorithm.

|                               |                                                                                                                                                                                                                                                                                                      |         |        |
|-------------------------------|------------------------------------------------------------------------------------------------------------------------------------------------------------------------------------------------------------------------------------------------------------------------------------------------------|---------|--------|
| Algorithm name                | GROM                                                                                                                                                                                                                                                                                                 | Version | 0.0.85 |
| Command lines with parameters | <pre>GROM -i synthetic.challenge.set3.normal.bwa_mem_sorted_rmdup.bam -r hg19.fa -o synthetic3_normal_GROM_0_0_85_q0_bwa_mem.txt -p 2 -q 0</pre><br><pre>GROM -i synthetic.challenge.set3.tumor.bwa_mem_sorted_rmdup.bam -r hg19.fa -o synthetic3_tumor_GROM_0_0_85_q35_bwa_mem.txt -p 2 -q 35</pre> |         |        |

Thresholds not indicated by command line

Reference ( check if unpublished  )

---

---

#### 4. Post-VCF filtering steps. (Command lines and parameters)

```
python vcf_parser37.py -l -g 50 -d 17 -u 16 -i 36 -s 31 -n  
synthetic3_normal_GROM_0_0_85_q0_bwa_mem.txt -t  
synthetic3_tumor_GROM_0_0_85_q35_bwa_mem.txt
```

---

---

#### 5. (Optional) Any other comments or steps not covered.

For vcf\_parser (4. Post-VCF filtering steps), -d -u -i -s are thresholds for deletions, duplications, inversions, and insertions, respectively, where a higher value is more stringent.

---

---

## ICGC-TCGA DREAM Somatic Mutation Calling Challenge Submission Documentation Form

|                 |                                                                                                                                  |
|-----------------|----------------------------------------------------------------------------------------------------------------------------------|
| Submission name | Syn3_V37_S2 (2478117, synthetic challenge 3)                                                                                     |
| Team            | Grigoriev-lab                                                                                                                    |
| Submission type | <input type="checkbox"/> INDEL   or <input checked="" type="checkbox"/> SV   or <input type="checkbox"/> SNV   (Only choose one) |

### 1. Read alignment. Did you use the BAM files provided?

Yes       No (Specify your aligner below)

|                               |                                                                                                                                                                          |         |       |
|-------------------------------|--------------------------------------------------------------------------------------------------------------------------------------------------------------------------|---------|-------|
| Aligner                       | BWA                                                                                                                                                                      | Version | 0.7.4 |
| Command lines with parameters | <pre>bwa mem -t 32 ./hg19.fa ./synthetic.challenge.set3.normal.1.fastq ./ synthetic.challenge.set3.normal.2.fastq &gt; synthetic.challenge.set3.normal.bwa_mem.sam</pre> |         |       |

### 2. Pre-processing steps to calibrate the BAM files. (Command lines and parameters)

- 1) `samtools view -bS -h synthetic.challenge.set3.normal.bwa_mem.sam > synthetic.challenge.set3.normal.bwa_mem.bam`
- 2) `samtools sort synthetic.challenge.set3.normal.bwa_mem.bam synthetic.challenge.set3.normal.bwa_mem_sorted`
- 3) `samtools index synthetic.challenge.set3.normal.bwa_mem_sorted.bam`
- 4) `samtools rmdup synthetic.challenge.set3.normal.bwa_mem_sorted.bam synthetic.challenge.set3.normal.bwa_mem_sorted_rmdup.bam`
- 5) `samtools index synthetic.challenge.set3.normal.bwa_mem_sorted_rmdup.bam`

### 3. Mutation calling algorithm.

|                               |                                                                                                                                                                                                                                                                                         |         |        |
|-------------------------------|-----------------------------------------------------------------------------------------------------------------------------------------------------------------------------------------------------------------------------------------------------------------------------------------|---------|--------|
| Algorithm name                | GROM                                                                                                                                                                                                                                                                                    | Version | 0.0.85 |
| Command lines with parameters | <pre>GROM -i synthetic.challenge.set3.normal.bwa_mem_sorted_rmdup.bam -r hg19.fa -o synthetic3_normal_GROM_0_0_85_q0_bwa_mem.txt -p 2 -q 0  GROM -i synthetic.challenge.set3.tumor.bwa_mem_sorted_rmdup.bam -r hg19.fa -o synthetic3_tumor_GROM_0_0_85_q35_bwa_mem.txt -p 2 -q 35</pre> |         |        |



Thresholds not indicated by command line

Reference ( check if unpublished  )

---

---

#### 4. Post-VCF filtering steps. (Command lines and parameters)

```
python vcf_parser37.py -l -g 50 -d 13 -u 12 -i 30 -s 12 -n  
synthetic3_normal_GROM_0_0_85_q0_bwa_mem.txt -t  
synthetic3_tumor_GROM_0_0_85_q35_bwa_mem.txt
```

---

---

#### 5. (Optional) Any other comments or steps not covered.

For `vcf_parser` (4. Post-VCF filtering steps), `-d -u -i -s` are thresholds for deletions, duplications, inversions, and insertions, respectively, where a higher value is more stringent.

---

---

## ICGC-TCGA DREAM Somatic Mutation Calling Challenge Submission Documentation Form

|                 |                                                                                                                            |
|-----------------|----------------------------------------------------------------------------------------------------------------------------|
| Submission name | Syn3_V375S (2478178, synthetic challenge 3)                                                                                |
| Team            | Grigoriev-lab                                                                                                              |
| Submission type | <input type="checkbox"/> INDEL or <input checked="" type="checkbox"/> SV or <input type="checkbox"/> SNV (Only choose one) |

### 1. Read alignment. Did you use the BAM files provided?

Yes  No (Specify your aligner below)

|                               |                                                                                                                                                                                      |         |       |
|-------------------------------|--------------------------------------------------------------------------------------------------------------------------------------------------------------------------------------|---------|-------|
| Aligner                       | BWA                                                                                                                                                                                  | Version | 0.7.4 |
| Command lines with parameters | <pre>bwa mem -t 32 ./hg19.fa<br/>./synthetic.challenge.set3.normal.1.fastq ./<br/>synthetic.challenge.set3.normal.2.fastq &gt;<br/>synthetic.challenge.set3.normal.bwa_mem.sam</pre> |         |       |

### 2. Pre-processing steps to calibrate the BAM files. (Command lines and parameters)

- 1) `samtools view -bS -h synthetic.challenge.set3.normal.bwa_mem.sam > synthetic.challenge.set3.normal.bwa_mem.bam`
- 2) `samtools sort synthetic.challenge.set3.normal.bwa_mem.bam synthetic.challenge.set3.normal.bwa_mem_sorted`
- 3) `samtools index synthetic.challenge.set3.normal.bwa_mem_sorted.bam`
- 4) `samtools rmdup synthetic.challenge.set3.normal.bwa_mem_sorted.bam synthetic.challenge.set3.normal.bwa_mem_sorted_rmdup.bam`
- 5) `samtools index synthetic.challenge.set3.normal.bwa_mem_sorted_rmdup.bam`

### 3. Mutation calling algorithm.

|                               |                                                                                                                                                                                                                                                                                                      |         |        |
|-------------------------------|------------------------------------------------------------------------------------------------------------------------------------------------------------------------------------------------------------------------------------------------------------------------------------------------------|---------|--------|
| Algorithm name                | GROM                                                                                                                                                                                                                                                                                                 | Version | 0.0.85 |
| Command lines with parameters | <pre>GROM -i synthetic.challenge.set3.normal.bwa_mem_sorted_rmdup.bam -r hg19.fa -o synthetic3_normal_GROM_0_0_85_q0_bwa_mem.txt -p 2 -q 0</pre><br><pre>GROM -i synthetic.challenge.set3.tumor.bwa_mem_sorted_rmdup.bam -r hg19.fa -o synthetic3_tumor_GROM_0_0_85_q35_bwa_mem.txt -p 2 -q 35</pre> |         |        |

Thresholds not indicated by command line

Reference ( check if unpublished  )

---

---

#### 4. Post-VCF filtering steps. (Command lines and parameters)

```
python vcf_parser37.py -l -c -b -d 17 -u 16 -i 37 -s 30 -n  
synthetic3_normal_GROM_0_0_85_q0_bwa_mem.txt -t  
synthetic3_tumor_GROM_0_0_85_q35_bwa_mem.txt
```

---

---

#### 5. (Optional) Any other comments or steps not covered.

For `vcf_parser` (4. Post-VCF filtering steps), `-d -u -i -s` are thresholds for deletions, duplications, inversions, and insertions, respectively, where a higher value is more stringent.

---

---

## ICGC-TCGA DREAM Somatic Mutation Calling Challenge Submission Documentation Form

|                        |                                |    |                                        |
|------------------------|--------------------------------|----|----------------------------------------|
| <b>Submission name</b> | pavfinder.set1.140324          |    |                                        |
| <b>Team</b>            | abyss                          |    |                                        |
| <b>Submission type</b> | <input type="checkbox"/> INDEL | or | <input checked="" type="checkbox"/> SV |
|                        |                                | or | <input type="checkbox"/> SNV           |
|                        | (Only choose one)              |    |                                        |

### 1. Read alignment. Did you use the BAM files provided?

Yes       No (Specify your aligner below)

|                                      |                |
|--------------------------------------|----------------|
| <b>Aligner</b>                       | <b>Version</b> |
| <b>Command lines with parameters</b> |                |

### 2. Pre-processing steps to calibrate the BAM files. (Command lines and parameters)

```
# input files
TUMOR_INPUT=synthetic.challenge.set1.tumor.v2.bam
NORMAL_INPUT=synthetic.challenge.set1.normal.v2.bam

# extract FASTQs with Picard Tools version 1.105
java -jar SamToFastq.jar INPUT=${TUMOR_INPUT} FASTQ=tumor_1.fq
SECOND_END_FASTQ=tumor_2.fq VALIDATION_STRINGENCY=SILENT
INCLUDE_NON_PF_READS=false
java -jar SamToFastq.jar INPUT=${NORMAL_INPUT} FASTQ=normal_1.fq
SECOND_END_FASTQ=normal_2.fq VALIDATION_STRINGENCY=SILENT
INCLUDE_NON_PF_READS=false
```

### 3. Mutation calling algorithm.

|                                      |                                                                                                                                                                                                                                                                                                                                                                                                                                                                                                                                                                                                                                 |                |        |
|--------------------------------------|---------------------------------------------------------------------------------------------------------------------------------------------------------------------------------------------------------------------------------------------------------------------------------------------------------------------------------------------------------------------------------------------------------------------------------------------------------------------------------------------------------------------------------------------------------------------------------------------------------------------------------|----------------|--------|
| <b>Algorithm name</b>                | PAVFinder                                                                                                                                                                                                                                                                                                                                                                                                                                                                                                                                                                                                                       | <b>Version</b> | r99287 |
| <b>Command lines with parameters</b> | <pre># 1. DE NOVO ASSEMBLY with ABySS  # (i) assemble tumor read pairs into scaffolds abyss-pe k=50 in="tumor_1.fq tumor_2.fq" name="tumor"  # (ii) break scaffolds into scaftigs faunscaffold tumor-8.fa &gt; tumor-final.fa  # (iii) extend junctions with `abyss-junction` abyss-junction -i tumor-5.path -v tumor-5.adj tumor-3.dist  MergeContigs -v -k 50 --merged &lt;(cat tumor-3.fa tumor-4.fa tumor-5.fa) tumor-5.adj -  sed -e 's/^&gt;/&gt;J/g' &gt;&gt; tumor-final.fa  { awk '/^&gt;/ {sub("&gt;", "", \$1); print \$1}' tumor-indel.fa; cut -d ' ' -f1 tumor-1.adj; }  sort -n  uniq -u &gt; tumor-nb.path</pre> |                |        |

```

abyss-junction -i tumor-nb.path -v tumor-1.adj |
MergeContigs -v -k 50 --merged tumor-1.fa tumor-1.adj
- |sed -e 's/^>/>I/g' >> tumor-final.fa

# 2. ALIGNMENT with BWA

# (i) align assembly to hg19
bwa mem -a hg19.fa tumor-final.fa |samtools view -hSu
- |samtools sort -o - $TMPDIR > tumor.c2g.bam
samtools index tumor.c2g.bam

# (ii) align tumor read pairs to assembly
bwa index tumor-final.fa
bwa mem tumor-final.fa tumor_1.fq tumor_2.fq |samtools
view -hSu - |samtools sort -o - $TMPDIR >
tumor.r2c.bam
samtools index tumor.r2c.bam

# (iii) align normal read pairs to assembly
bwa mem tumor-final.fa normal_1.fq normal_2.fq |
samtools view -hSu - |samtools sort -o - $TMPDIR >
normal.r2c.bam
samtools index normal.r2c.bam

# 3. CALL SVs with PAVfinder
pavfinder genome tumor.c2g.bam bwa_mem tumor-final.fa
hg19.fa pavfinder_output_dir -b tumor.r2c.bam
--normal_bam normal.r2c.bam --min_size 100

```

Thresholds not  
indicated by  
command line

Reference  
( check if  
unpublished  )

---

4. Post-VCF filtering steps. (Command lines and parameters)

---

---

5. (Optional) Any other comments or steps not covered.

The above commands require the following software packages:

1. Picard Tools version 1.105
  2. ABySS version 1.3.7
  3. faunscaffold < <https://github.com/sjackman/fastascripts> >
  4. BWA version 0.7.4-r385
  5. SAMtools version 0.1.19-44428cd
  6. PAVFinder version r99287
- 
-

## ICGC-TCGA DREAM Somatic Mutation Calling Challenge Submission Documentation Form

|                        |                                |    |                                        |
|------------------------|--------------------------------|----|----------------------------------------|
| <b>Submission name</b> | pavfinder.set2.140401          |    |                                        |
| <b>Team</b>            | abyss                          |    |                                        |
| <b>Submission type</b> | <input type="checkbox"/> INDEL | or | <input checked="" type="checkbox"/> SV |
|                        |                                | or | <input type="checkbox"/> SNV           |
|                        | (Only choose one)              |    |                                        |

### 1. Read alignment. Did you use the BAM files provided?

Yes       No (Specify your aligner below)

|                                      |                |
|--------------------------------------|----------------|
| <b>Aligner</b>                       | <b>Version</b> |
| <b>Command lines with parameters</b> |                |

### 2. Pre-processing steps to calibrate the BAM files. (Command lines and parameters)

```
# input files
TUMOR_INPUT=synthetic.challenge.set2.tumor.bam
NORMAL_INPUT=synthetic.challenge.set2.normal.bam

# extract FASTQs with Picard Tools version 1.105
java -jar SamToFastq.jar INPUT=${TUMOR_INPUT} FASTQ=tumor_1.fq
SECOND_END_FASTQ=tumor_2.fq VALIDATION_STRINGENCY=SILENT
INCLUDE_NON_PF_READS=false
java -jar SamToFastq.jar INPUT=${NORMAL_INPUT} FASTQ=normal_1.fq
SECOND_END_FASTQ=normal_2.fq VALIDATION_STRINGENCY=SILENT
INCLUDE_NON_PF_READS=false
```

### 3. Mutation calling algorithm.

|                                      |                                                                                                                                                                                                                                                                                                                                                                                                                                                                                                                                                                                                                                 |                |        |
|--------------------------------------|---------------------------------------------------------------------------------------------------------------------------------------------------------------------------------------------------------------------------------------------------------------------------------------------------------------------------------------------------------------------------------------------------------------------------------------------------------------------------------------------------------------------------------------------------------------------------------------------------------------------------------|----------------|--------|
| <b>Algorithm name</b>                | PAVFinder                                                                                                                                                                                                                                                                                                                                                                                                                                                                                                                                                                                                                       | <b>Version</b> | r99356 |
| <b>Command lines with parameters</b> | <pre># 1. DE NOVO ASSEMBLY with ABySS  # (i) assemble tumor read pairs into scaffolds abyss-pe k=50 in="tumor_1.fq tumor_2.fq" name="tumor"  # (ii) break scaffolds into scaftigs faunscaffold tumor-8.fa &gt; tumor-final.fa  # (iii) extend junctions with `abyss-junction` abyss-junction -i tumor-5.path -v tumor-5.adj tumor-3.dist  MergeContigs -v -k 50 --merged &lt;(cat tumor-3.fa tumor-4.fa tumor-5.fa) tumor-5.adj -  sed -e 's/^&gt;/&gt;J/g' &gt;&gt; tumor-final.fa  { awk '/^&gt;/ {sub("&gt;", "", \$1); print \$1}' tumor-indel.fa; cut -d ' ' -f1 tumor-1.adj; }  sort -n  uniq -u &gt; tumor-nb.path</pre> |                |        |

```

abyss-junction -i tumor-nb.path -v tumor-1.adj |
MergeContigs -v -k 50 --merged tumor-1.fa tumor-1.adj
- |sed -e 's/^>/>I/g' >> tumor-final.fa

# 2. ALIGNMENT with BWA

# (i) align assembly to hg19
bwa mem -a hg19.fa tumor-final.fa |samtools view -hSu
- |samtools sort -o - $TMPDIR > tumor.c2g.bam
samtools index tumor.c2g.bam

# (ii) align tumor read pairs to assembly
bwa index tumor-final.fa
bwa mem tumor-final.fa tumor_1.fq tumor_2.fq |samtools
view -hSu - |samtools sort -o - $TMPDIR >
tumor.r2c.bam
samtools index tumor.r2c.bam

# (iii) align normal read pairs to assembly
bwa mem tumor-final.fa normal_1.fq normal_2.fq |
samtools view -hSu - |samtools sort -o - $TMPDIR >
normal.r2c.bam
samtools index normal.r2c.bam

# 3. CALL SVs with PAVfinder
pavfinder genome tumor.c2g.bam bwa_mem tumor-final.fa
hg19.fa pavfinder_output_dir -b tumor.r2c.bam
--normal_bam normal.r2c.bam --min_size 100

```

Thresholds not  
indicated by  
command line

Reference  
( check if  
unpublished  )

---

4. Post-VCF filtering steps. (Command lines and parameters)



---

---

5. (Optional) Any other comments or steps not covered.

The above commands require the following software packages:

1. Picard Tools version 1.105
  2. ABySS version 1.3.7
  3. faunscaffold < <https://github.com/sjackman/fastascripts> >
  4. BWA version 0.7.4-r385
  5. SAMtools version 0.1.19-44428cd
  6. PAVFinder version r99356
- 
-

# ICGC-TCGA DREAM Somatic Mutation Calling Challenge Submission Documentation Form

Submission name pavfinder.set3.140509  
Team abyss  
Submission type  INDEL or  SV or  SNV (Only choose one)

## 1. Read alignment. Did you use the BAM files provided?

Yes  No (Specify your aligner below)

Aligner

Version

Command lines with parameters

## 2. Pre-processing steps to calibrate the BAM files. (Command lines and parameters)

```
# input files
TUMOR_INPUT=synthetic.challenge.set3.tumor.bam
NORMAL_INPUT=synthetic.challenge.set3.normal.bam

# extract FASTQs with Picard Tools
java -jar SamToFastq.jar INPUT=${TUMOR_INPUT} FASTQ=tumor_1.fq
SECOND_END_FASTQ=tumor_2.fq VALIDATION_STRINGENCY=SILENT
INCLUDE_NON_PF_READS=false
java -jar SamToFastq.jar INPUT=${NORMAL_INPUT} FASTQ=normal_1.fq
SECOND_END_FASTQ=normal_2.fq VALIDATION_STRINGENCY=SILENT
INCLUDE_NON_PF_READS=false
```

## 3. Mutation calling algorithm.

Algorithm name

PAVFinder

Version

r100231

Command lines with parameters

```
# 1. DE NOVO ASSEMBLY with ABySS

# (i) assemble tumor read pairs into scaffolds
abyss-pe k=50 in="tumor_1.fq tumor_2.fq" name="tumor"

# (ii) break scaffolds into scaftigs
faunscaffold tumor-8.fa > tumor-final.fa

# (iii) extend junctions with `abyss-junction`
abyss-junction -i tumor-5.path -v tumor-5.adj tumor-3.dist |MergeContigs -v -k 50 --merged <(cat tumor-3.fa tumor-4.fa tumor-5.fa) tumor-5.adj - |sed -e 's/^>/>J/g' >> tumor-final.fa

{ awk '/^>/ {sub(">", "", $1); print $1}' tumor-indel.fa; cut -d ' ' -f1 tumor-1.adj; } |sort -n |uniq -u > tumor-nb.path
```

```
abyss-junction -i tumor-nb.path -v tumor-1.adj |
MergeContigs -v -k 50 --merged tumor-1.fa tumor-1.adj -
|sed -e 's/^>/>I/g' >> tumor-final.fa
```

```
# 2. ALIGNMENT with BWA
```

```
# (i) align assembly to hg19
bwa mem -a hg19.fa tumor-final.fa |samtools view -hSu -
|samtools sort -o - $TMPDIR > tumor.c2g.bam
samtools index tumor.c2g.bam
```

```
# (ii) align tumor read pairs to assembly
bwa index tumor-final.fa
bwa mem tumor-final.fa tumor_1.fq tumor_2.fq |samtools
view -hSu - |samtools sort -o - $TMPDIR > tumor.r2c.bam
samtools index tumor.r2c.bam
```

```
# (iii) align normal read pairs to assembly
bwa mem tumor-final.fa normal_1.fq normal_2.fq |
samtools view -hSu - |samtools sort -o - $TMPDIR >
normal.r2c.bam
samtools index normal.r2c.bam
```

```
# 3. CALL SVs with PAVfinder
pavfinder genome tumor.c2g.bam bwa_mem tumor-final.fa
hg19.fa pavfinder_output_dir -b tumor.r2c.bam
--normal_bam normal.r2c.bam --min_size 100
```

Thresholds not  
indicated by  
command line

Reference  
( check if  
unpublished  )

---

4. Post-VCF filtering steps. (Command lines and parameters)

---

---

5. (Optional) Any other comments or steps not covered.

The above commands require the following software packages:

1. Picard Tools version 1.105
  2. ABySS version 1.3.7
  3. faunscaffold < <https://github.com/sjackman/fastascripts> >
  4. BWA version 0.7.4-r385
  5. SAMtools version 0.1.19-44428cd
  6. PAVFinder version r100231
- 
-

## ICGC-TCGA DREAM Somatic Mutation Calling Challenge Submission Documentation Form

|                 |                                                                                          |
|-----------------|------------------------------------------------------------------------------------------|
| Submission name | dtest                                                                                    |
| Team            | Team2014                                                                                 |
| Submission type | <input checked="" type="checkbox"/> SV or <input type="checkbox"/> SNV (Only choose one) |

### 1. Read alignment. Did you use the BAM files provided?

Yes  No (Specify your aligner below)

|                               |         |
|-------------------------------|---------|
| Aligner                       | Version |
| Command lines with parameters |         |

### 2. Pre-processing steps to calibrate the BAM files. (Command lines and parameters)

No pre-processing steps

### 3. Mutation calling algorithm.

|                               |                                                                                                                                                                                                                                                                                                     |         |       |
|-------------------------------|-----------------------------------------------------------------------------------------------------------------------------------------------------------------------------------------------------------------------------------------------------------------------------------------------------|---------|-------|
| Algorithm name                | Delly                                                                                                                                                                                                                                                                                               | Version | 0.3.3 |
| Command lines with parameters | <pre>#!/bin/bash  for type in DEL DUP INV TRA  do ./delly_v0.3.3_parallel_linux_x86_64bit -t \$type -o set1.\$type.vcf -g /home/dw670/broad/Homo_sapiens_assembly19.fasta /home/dw670/dream/synthetic.challenge.set1v2.normal.bam /home/dw670/dream/synthetic.challenge.set1v2.tumor.bam done</pre> |         |       |

Thresholds not indicated by command line

Reference

( check if unpublished  )

Tobias Rausch, Thomas Zichner, Andreas Schlattl, Adrian M. Stuetz, Vladimir Benes, Jan O. Korb. DELLY: structural variant discovery by integrated paired-end and split-read analysis. *Bioinformatics* 2012 28: i333-i339.

---

---

#### 4. Post-VCF filtering steps. (Command lines and parameters)

```
python ./somaticFilter.py -v set1.DEL.vcf -o set1.DEL.somatic.m100.vcf -t DEL -m 100 -f
python ./somaticFilter.py -v set1.DUP.vcf -o set1.DUP.somatic.m100.vcf -t DUP -m 100 -f
python ./somaticFilter.py -v set1.INV.vcf -o set1.INV.somatic.m100.vcf -t INV -m 100 -f
python ./somaticFilter.py -v set1.TRA.vcf -o set1.TRA.somatic.m100.vcf -t TRA -m 100 -f
```

---

---

#### 5. (Optional) Any other comments or steps not covered.

set1.DEL.somatic.m100.vcf, set1.DUP.somatic.m100.vcf, set1.INV.somatic.m100.vcf and set1.TRA.somatic.m100.vcf were merged together as set1.sv.somatic.m100.vcf for submission.

---

---

## ICGC-TCGA DREAM Somatic Mutation Calling Challenge Submission Documentation Form

|                 |                                                                                          |
|-----------------|------------------------------------------------------------------------------------------|
| Submission name | dtest                                                                                    |
| Team            | Team2014                                                                                 |
| Submission type | <input checked="" type="checkbox"/> SV or <input type="checkbox"/> SNV (Only choose one) |

### 1. Read alignment. Did you use the BAM files provided?

Yes  No (Specify your aligner below)

|                               |         |
|-------------------------------|---------|
| Aligner                       | Version |
| Command lines with parameters |         |

### 2. Pre-processing steps to calibrate the BAM files. (Command lines and parameters)

No pre-processing steps

### 3. Mutation calling algorithm.

|                               |                                                                                                                                                                                                                                                                                                     |         |       |
|-------------------------------|-----------------------------------------------------------------------------------------------------------------------------------------------------------------------------------------------------------------------------------------------------------------------------------------------------|---------|-------|
| Algorithm name                | Delly                                                                                                                                                                                                                                                                                               | Version | 0.3.3 |
| Command lines with parameters | <pre>#!/bin/bash  for type in DEL DUP INV TRA  do ./delly_v0.3.3_parallel_linux_x86_64bit -t \$type -o set1.\$type.vcf -g /home/dw670/broad/Homo_sapiens_assembly19.fasta /home/dw670/dream/synthetic.challenge.set1v2.normal.bam /home/dw670/dream/synthetic.challenge.set1v2.tumor.bam done</pre> |         |       |

Thresholds not indicated by command line

Reference

( check if unpublished  )

Tobias Rausch, Thomas Zichner, Andreas Schlattl, Adrian M. Stuetz, Vladimir Benes, Jan O. Korb. DELLY: structural variant discovery by integrated paired-end and split-read analysis. *Bioinformatics* 2012 28: i333-i339.

---

---

#### 4. Post-VCF filtering steps. (Command lines and parameters)

```
python ./somaticFilter.py -v set1.DEL.vcf -o set1.DEL.somatic.m100.vcf -t DEL -m 200 -f
python ./somaticFilter.py -v set1.DUP.vcf -o set1.DUP.somatic.m100.vcf -t DUP -m 200 -f
python ./somaticFilter.py -v set1.INV.vcf -o set1.INV.somatic.m100.vcf -t INV -m 200 -f
python ./somaticFilter.py -v set1.TRA.vcf -o set1.TRA.somatic.m100.vcf -t TRA -m 200 -f
```

---

---

#### 5. (Optional) Any other comments or steps not covered.

set1.DEL.somatic.m200.vcf, set1.DUP.somatic.m200.vcf, set1.INV.somatic.m200.vcf and set1.TRA.somatic.m200.vcf were merged together as set1.sv.somatic.m200.vcf for submission.

---

---



## ICGC-TCGA DREAM Somatic Mutation Calling Challenge Submission Documentation Form

|                 |                                                                                          |
|-----------------|------------------------------------------------------------------------------------------|
| Submission name | d9bp                                                                                     |
| Team            | Team2014                                                                                 |
| Submission type | <input checked="" type="checkbox"/> SV or <input type="checkbox"/> SNV (Only choose one) |

### 1. Read alignment. Did you use the BAM files provided?

Yes  No (Specify your aligner below)

|                               |         |
|-------------------------------|---------|
| Aligner                       | Version |
| Command lines with parameters |         |

### 2. Pre-processing steps to calibrate the BAM files. (Command lines and parameters)

No pre-processing steps

### 3. Mutation calling algorithm.

|                               |                                                                                                                                                                                                                                                                                                 |         |       |
|-------------------------------|-------------------------------------------------------------------------------------------------------------------------------------------------------------------------------------------------------------------------------------------------------------------------------------------------|---------|-------|
| Algorithm name                | Delly                                                                                                                                                                                                                                                                                           | Version | 0.3.3 |
| Command lines with parameters | <pre>#!/bin/bash  for type in DEL DUP INV TRA  do ./delly_v0.3.3_parallel_linux_x86_64bit -t \$type -o set2.\$type.vcf -g /home/dw670/broad/Homo_sapiens_assembly19.fasta /home/dw670/dream/synthetic.challenge.set2.normal.bam /home/dw670/dream/synthetic.challenge.set2.tumor.bam done</pre> |         |       |

Thresholds not indicated by command line

Reference

( check if unpublished  )

Tobias Rausch, Thomas Zichner, Andreas Schlattl, Adrian M. Stuetz, Vladimir Benes, Jan O. Korb. DELLY: structural variant discovery by integrated paired-end and split-read analysis. Bioinformatics 2012 28: i333-i339.

---

---

#### 4. Post-VCF filtering steps. (Command lines and parameters)

```
python ./somaticFilter.py -v set2.DEL.vcf -o set2.DEL.somatic.m100.vcf -t DEL -m 100 -f
python ./somaticFilter.py -v set2.DUP.vcf -o set2.DUP.somatic.m100.vcf -t DUP -m 100 -f
python ./somaticFilter.py -v set2.INV.vcf -o set2.INV.somatic.m100.vcf -t INV -m 100 -f
python ./somaticFilter.py -v set2.TRA.vcf -o set2.TRA.somatic.m100.vcf -t TRA -m 100 -f
```

---

---

#### 5. (Optional) Any other comments or steps not covered.

```
#!/bin/bash
for type in DEL DUP INV TRA
do
grep 'CIEND=0,0;CIPOS=0,0' set2.$type.somatic.m100.vcf > set2.$type.somatic.m100-0.0.vcf
grep 'CIEND=-1,1;CIPOS=-1,1' set2.$type.somatic.m100.vcf > set2.$type.somatic.m100-1.1.vcf
grep 'CIEND=-2,2;CIPOS=-2,2' set2.$type.somatic.m100.vcf > set2.$type.somatic.m100-2.2.vcf
grep 'CIEND=-3,3;CIPOS=-3,3' set2.$type.somatic.m100.vcf > set2.$type.somatic.m100-3.3.vcf
grep 'CIEND=-3,3;CIPOS=-4,4' set2.$type.somatic.m100.vcf > set2.$type.somatic.m100-4.4.vcf

cat set2.$type.somatic.m100-0.0.vcf >> set2.sv.somatic.m100-9mer.vcf
cat set2.$type.somatic.m100-1.1.vcf >> set2.sv.somatic.m100-9mer.vcf
cat set2.$type.somatic.m100-2.2.vcf >> set2.sv.somatic.m100-9mer.vcf
cat set2.$type.somatic.m100-3.3.vcf >> set2.sv.somatic.m100-9mer.vcf
cat set2.$type.somatic.m100-4.4.vcf >> set2.sv.somatic.m100-9mer.vcf

done
```

---

---



## ICGC-TCGA DREAM Somatic Mutation Calling Challenge Submission Documentation Form

Submission name dhqpres  
Team Team2014  
Submission type  SV or  SNV (Only choose one)

### 1. Read alignment. Did you use the BAM files provided?

Yes  No (Specify your aligner below)

Aligner

Version

Command lines with  
parameters

### 2. Pre-processing steps to calibrate the BAM files. (Command lines and parameters)

No pre-processing steps

### 3. Mutation calling algorithm.

Algorithm name

Delly

Version

0.3.3

Command lines with  
parameters

```
#!/bin/bash

for type in DEL DUP INV TRA

do
./delly_v0.3.3_parallel_linux_x86_64bit -t $type -o set2.$type.vcf -g
/home/dw670/broad/Homo_sapiens_assembly19.fasta
/home/dw670/dream/synthetic.challenge.set2.normal.bam
/home/dw670/dream/synthetic.challenge.set2.tumor.bam
done
```

Thresholds not indicated by command line

Reference  
( check if unpublished  )

Tobias Rausch, Thomas Zichner, Andreas Schlattl, Adrian M. Stuetz, Vladimir Benes, Jan O. Korb. DELLY: structural variant discovery by integrated paired-end and split-read analysis. Bioinformatics 2012 28: i333-i339.

---

---

#### 4. Post-VCF filtering steps. (Command lines and parameters)

```
#!/bin/bash
for type in DEL DUP INV TRA
do
python ./somaticFilter.py -v set2.$type.vcf -o set2.DEL.somatic.m100.vcf -t $type -m 100 -f
cat set2.$type.somatic.m100.vcf >> set2.sv.somatic.m100.vcf
done
```

---

---

#### 5. (Optional) Any other comments or steps not covered.

From set2.sv.somatic.m100.vcf

- 1> Extract 'CIEND=-1,1;CIPOS=-1,1' records.
  - 2> removed LowQual records.
  - 3> removed IMPRECISE records.
  - 4> extract PASS records
  - 5> generated set2.sv.somatic.m100.sub2.vcf for submission.
- 
-

## ICGC-TCGA DREAM Somatic Mutation Calling Challenge Submission Documentation Form

Submission name dtest\_m100  
Team Team2014  
Submission type  SV or  SNV (Only choose one)

### 1. Read alignment. Did you use the BAM files provided?

Yes  No (Specify your aligner below)

Aligner

Version

Command lines with  
parameters

### 2. Pre-processing steps to calibrate the BAM files. (Command lines and parameters)

No pre-processing steps

### 3. Mutation calling algorithm.

Algorithm name

Delly

Version

0.3.3

Command lines with  
parameters

```
#!/bin/bash
```

```
for type in DEL DUP INV TRA
```

```
do
```

```
./delly_v0.3.3_parallel_linux_x86_64bit -t $type -o set3.$type.vcf -g
```

```
/home/dw670/broad/Homo_sapiens_assembly19.fasta
```

```
/home/dw670/dream/synthetic.challenge.set3.normal.bam
```

```
/home/dw670/dream/synthetic.challenge.set3.tumor.bam
```

```
done
```

Thresholds not indicated by command line

Reference

( check if unpublished  )

Tobias Rausch, Thomas Zichner, Andreas Schlattl, Adrian M. Stuetz, Vladimir Benes, Jan O. Korb. DELLY: structural variant discovery by integrated paired-end and split-read analysis. *Bioinformatics* 2012 28: i333-i339.

---

---

#### 4. Post-VCF filtering steps. (Command lines and parameters)

```
python ./somaticFilter.py -v set3.DEL.vcf -o set3.DEL.somatic.m100.vcf -t DEL -m 100 -f
python ./somaticFilter.py -v set3.DUP.vcf -o set3.DUP.somatic.m100.vcf -t DUP -m 100 -f
python ./somaticFilter.py -v set3.INV.vcf -o set3.INV.somatic.m100.vcf -t INV -m 100 -f
python ./somaticFilter.py -v set3.TRA.vcf -o set3.TRA.somatic.m100.vcf -t TRA -m 100 -f
```

---

---

#### 5. (Optional) Any other comments or steps not covered.

set3.DEL.somatic.m100.vcf, set3.DUP.somatic.m100.vcf, set3.INV.somatic.m100.vcf and set3.TRA.somatic.m100.vcf were merged together as set13.sv.somatic.m100.vcf for submission.

---

---

## ICGC-TCGA DREAM Somatic Mutation Calling Challenge Submission Documentation Form

|                 |                                                                                          |
|-----------------|------------------------------------------------------------------------------------------|
| Submission name | dtest                                                                                    |
| Team            | Team2014                                                                                 |
| Submission type | <input checked="" type="checkbox"/> SV or <input type="checkbox"/> SNV (Only choose one) |

### 1. Read alignment. Did you use the BAM files provided?

Yes  No (Specify your aligner below)

|                               |         |
|-------------------------------|---------|
| Aligner                       | Version |
| Command lines with parameters |         |

### 2. Pre-processing steps to calibrate the BAM files. (Command lines and parameters)

No pre-processing steps

### 3. Mutation calling algorithm.

|                               |                                                                                                                                                                                                                                                                                                 |         |       |
|-------------------------------|-------------------------------------------------------------------------------------------------------------------------------------------------------------------------------------------------------------------------------------------------------------------------------------------------|---------|-------|
| Algorithm name                | Delly                                                                                                                                                                                                                                                                                           | Version | 0.3.3 |
| Command lines with parameters | <pre>#!/bin/bash  for type in DEL DUP INV TRA  do ./delly_v0.3.3_parallel_linux_x86_64bit -t \$type -o set2.\$type.vcf -g /home/dw670/broad/Homo_sapiens_assembly19.fasta /home/dw670/dream/synthetic.challenge.set2.normal.bam /home/dw670/dream/synthetic.challenge.set2.tumor.bam done</pre> |         |       |



Thresholds not indicated by command line

Reference

( check if unpublished  )

Tobias Rausch, Thomas Zichner, Andreas Schlattl, Adrian M. Stuetz, Vladimir Benes, Jan O. Korb. DELLY: structural variant discovery by integrated paired-end and split-read analysis. *Bioinformatics* 2012 28: i333-i339.

---

---

#### 4. Post-VCF filtering steps. (Command lines and parameters)

```
python ./somaticFilter.py -v set3.DEL.vcf -o set3.DEL.somatic.m100.vcf -t DEL -m 200 -f
python ./somaticFilter.py -v set3.DUP.vcf -o set3.DUP.somatic.m100.vcf -t DUP -m 200 -f
python ./somaticFilter.py -v set3.INV.vcf -o set3.INV.somatic.m100.vcf -t INV -m 200 -f
python ./somaticFilter.py -v set3.TRA.vcf -o set3.TRA.somatic.m100.vcf -t TRA -m 200 -f
```

---

---

#### 5. (Optional) Any other comments or steps not covered.

set3.DEL.somatic.m200.vcf, set3.DUP.somatic.m200.vcf, set3.INV.somatic.m200.vcf and set3.TRA.somatic.m200.vcf were merged together as set13.sv.somatic.m200.vcf for submission.

---

---

## ICGC-TCGA DREAM Somatic Mutation Calling Challenge Submission Documentation Form

|                                                                                           |                                         |                                                          |                                                |
|-------------------------------------------------------------------------------------------|-----------------------------------------|----------------------------------------------------------|------------------------------------------------|
| Submission name                                                                           | destruct-8 (ID: 2385623)                |                                                          |                                                |
| Team                                                                                      | SFU                                     |                                                          |                                                |
| Submission type                                                                           | <input checked="" type="checkbox"/> SV  | or                                                       | <input type="checkbox"/> SNV (Only choose one) |
| <b>1. Read alignment. Did you use the BAM files provided?</b>                             |                                         |                                                          |                                                |
|                                                                                           | <input checked="" type="checkbox"/> Yes | <input type="checkbox"/> No (Specify your aligner below) |                                                |
| Aligner                                                                                   |                                         | Version                                                  |                                                |
| Command lines with parameters                                                             |                                         |                                                          |                                                |
| <b>2. Pre-processing steps to calibrate the BAM files. (Command lines and parameters)</b> |                                         |                                                          |                                                |

|                                       |                                                                                                                                                                                         |         |       |
|---------------------------------------|-----------------------------------------------------------------------------------------------------------------------------------------------------------------------------------------|---------|-------|
| <b>3. Mutation calling algorithm.</b> |                                                                                                                                                                                         |         |       |
| Algorithm name                        | deStruct                                                                                                                                                                                | Version | 0.1.0 |
| Command lines with parameters         | python destruct.py --myconfig.ini --tmpdir silico2-temp --submit<br>asyncqsub --maxjobs 100 --repopulate --verbose silico2.lib silico2-<br>result/breakpoints silico2-result/breakreads |         |       |

Thresholds not indicated by command line

Reference ( check if unpublished  )

---

---

#### 4. Post-VCF filtering steps. (Command lines and parameters)

---

---

#### 5. (Optional) Any other comments or steps not covered.

After execution of deStruct, the output file 'breakpoints' is converted to VCF format using 'destruct2VCF.py' supplementary tool.

Alignment probability is set to be higher than 0.8; chimeric and valid probabilities are set to be higher than 0.5. Calls with tumor read support below 3 are filtered:

```
python destruct2VCF.py -b silico2-result/breakpoints -f silico2-result/filtered-reads -o silico2-result/test.vcf -a 0.8 -c 0.5 -v 0.5 -t 3
```

## ICGC-TCGA DREAM Somatic Mutation Calling Challenge Submission Documentation Form

|                 |                                                                                          |
|-----------------|------------------------------------------------------------------------------------------|
| Submission name | destruct-8-o                                                                             |
| Team            | SFU                                                                                      |
| Submission type | <input checked="" type="checkbox"/> SV or <input type="checkbox"/> SNV (Only choose one) |

### 1. Read alignment. Did you use the BAM files provided?

Yes  No (Specify your aligner below)

|                               |         |
|-------------------------------|---------|
| Aligner                       | Version |
| Command lines with parameters |         |

### 2. Pre-processing steps to calibrate the BAM files. (Command lines and parameters)

### 3. Mutation calling algorithm.

|                               |                                                                                                                                                                                         |         |       |
|-------------------------------|-----------------------------------------------------------------------------------------------------------------------------------------------------------------------------------------|---------|-------|
| Algorithm name                | deStruct                                                                                                                                                                                | Version | 0.1.0 |
| Command lines with parameters | python destruct.py --myconfig.ini --tmpdir silico2-temp --submit<br>asyncqsub --maxjobs 100 --repopulate --verbose silico2.lib silico2-<br>result/breakpoints silico2-result/breakreads |         |       |

Thresholds not indicated by command line

Reference ( check if unpublished  )

---

---

#### 4. Post-VCF filtering steps. (Command lines and parameters)

---

---

#### 5. (Optional) Any other comments or steps not covered.

After execution of deStruct, the output file 'breakpoints' is converted to VCF format using 'destruct2VCF.py' supplementary tool.

Alignment probability is set to be higher than 0.8; chimeric and valid probabilities are set to be higher than 0.5:

```
python destruct2VCF.py -b silico2-result/breakpoints -f silico2-result/filtered-reads -o silico2-result/original.vcf -a 0.8 -c 0.5 -v 0.5 -t 0
```

## ICGC-TCGA DREAM Somatic Mutation Calling Challenge Submission Documentation Form

|                 |                                                                                          |
|-----------------|------------------------------------------------------------------------------------------|
| Submission name | destruct-8 (ID: 2385598)                                                                 |
| Team            | SFU                                                                                      |
| Submission type | <input checked="" type="checkbox"/> SV or <input type="checkbox"/> SNV (Only choose one) |

### 1. Read alignment. Did you use the BAM files provided?

Yes  No (Specify your aligner below)

|                               |         |
|-------------------------------|---------|
| Aligner                       | Version |
| Command lines with parameters |         |

### 2. Pre-processing steps to calibrate the BAM files. (Command lines and parameters)

### 3. Mutation calling algorithm.

|                               |                                                                                                                                                                                  |         |       |
|-------------------------------|----------------------------------------------------------------------------------------------------------------------------------------------------------------------------------|---------|-------|
| Algorithm name                | deStruct                                                                                                                                                                         | Version | 0.1.0 |
| Command lines with parameters | python destruct.py --myconfig.ini --tmpdir silico2-temp --submit asyncqsub --maxjobs 100 --repopulate --verbose silico2.lib silico2-result/breakpoints silico2-result/breakreads |         |       |

Thresholds not  
indicated by  
command line

Reference  
( check if  
unpublished  )

---

---

#### 4. Post-VCF filtering steps. (Command lines and parameters)

---

---

#### 5. (Optional) Any other comments or steps not covered.

After execution of deStruct, the output file 'breakpoints' is converted to VCF format using 'destruct2VCF.py' supplementary tool.

Alignment probability is set to be higher than 0.8; chimeric and valid probabilities are set to be higher than 0.5. Calls with tumor read support below 2 are filtered:

```
python destruct2VCF.py -b silico2-result/breakpoints -f silico2-result/filtered-reads -o silico2-  
result/result.vcf -a 0.8 -c 0.5 -v 0.5 -t 2
```

## ICGC-TCGA DREAM Somatic Mutation Calling Challenge Submission Documentation Form

|                 |                                                                                          |
|-----------------|------------------------------------------------------------------------------------------|
| Submission name | destruct-8-q                                                                             |
| Team            | SFU                                                                                      |
| Submission type | <input checked="" type="checkbox"/> SV or <input type="checkbox"/> SNV (Only choose one) |

### 1. Read alignment. Did you use the BAM files provided?

Yes  No (Specify your aligner below)

|                               |         |
|-------------------------------|---------|
| Aligner                       | Version |
| Command lines with parameters |         |

### 2. Pre-processing steps to calibrate the BAM files. (Command lines and parameters)

### 3. Mutation calling algorithm.

|                               |                                                                                                                                                                                  |         |       |
|-------------------------------|----------------------------------------------------------------------------------------------------------------------------------------------------------------------------------|---------|-------|
| Algorithm name                | deStruct                                                                                                                                                                         | Version | 0.1.0 |
| Command lines with parameters | python destruct.py --myconfig.ini --tmpdir silico2-temp --submit asyncqsub --maxjobs 100 --repopulate --verbose silico2.lib silico2-result/breakpoints silico2-result/breakreads |         |       |



Thresholds not indicated by command line

Reference ( check if unpublished  )

---

---

#### 4. Post-VCF filtering steps. (Command lines and parameters)

---

---

#### 5. (Optional) Any other comments or steps not covered.

After execution of deStruct, the output file 'breakpoints' is converted to VCF format using 'destruct2VCF.py' supplementary tool.

Alignment probability is set to be higher than 0.8:

```
python destruct2VCF.py -b silico2-result/breakpoints -f silico2-result/filtered-reads -o silico2-result/noqfilt.vcf -a 0.8 -c 0 -v 0 -t 0
```

## ICGC-TCGA DREAM Somatic Mutation Calling Challenge Submission Documentation Form

|                 |                                                                                          |
|-----------------|------------------------------------------------------------------------------------------|
| Submission name | destruct-align_prob_filter                                                               |
| Team            | SFU                                                                                      |
| Submission type | <input checked="" type="checkbox"/> SV or <input type="checkbox"/> SNV (Only choose one) |

### 1. Read alignment. Did you use the BAM files provided?

Yes  No (Specify your aligner below)

|                               |         |
|-------------------------------|---------|
| Aligner                       | Version |
| Command lines with parameters |         |

### 2. Pre-processing steps to calibrate the BAM files. (Command lines and parameters)

### 3. Mutation calling algorithm.

|                               |                                                                                                                                                                                  |         |       |
|-------------------------------|----------------------------------------------------------------------------------------------------------------------------------------------------------------------------------|---------|-------|
| Algorithm name                | deStruct                                                                                                                                                                         | Version | 0.1.0 |
| Command lines with parameters | python destruct.py --myconfig.ini --tmpdir silico2-temp --submit asyncqsub --maxjobs 100 --repopulate --verbose silico2.lib silico2-result/breakpoints silico2-result/breakreads |         |       |

Thresholds not indicated by command line

Reference ( check if unpublished  )

---

---

#### 4. Post-VCF filtering steps. (Command lines and parameters)

---

---

#### 5. (Optional) Any other comments or steps not covered.

After execution of deStruct, the output file 'breakpoints' is converted to VCF format using 'destruct2VCF.py' supplementary tool.

Calls with alignment probability below 0.9 are filtered:

```
python destruct2VCF.py -b silico2-result/breakpoints -f silico2-result/filtered-reads -o silico2-result/result-gt0.9.vcf -a 0.9 -c 0 -v 0 -t 0
```

## ICGC-TCGA DREAM Somatic Mutation Calling Challenge Submission Documentation Form

|                 |                                                                                          |
|-----------------|------------------------------------------------------------------------------------------|
| Submission name | destruct-chimeric_prob_filter                                                            |
| Team            | SFU                                                                                      |
| Submission type | <input checked="" type="checkbox"/> SV or <input type="checkbox"/> SNV (Only choose one) |

### 1. Read alignment. Did you use the BAM files provided?

Yes  No (Specify your aligner below)

|                               |         |
|-------------------------------|---------|
| Aligner                       | Version |
| Command lines with parameters |         |

### 2. Pre-processing steps to calibrate the BAM files. (Command lines and parameters)

### 3. Mutation calling algorithm.

|                               |                                                                                                                                                                                         |         |       |
|-------------------------------|-----------------------------------------------------------------------------------------------------------------------------------------------------------------------------------------|---------|-------|
| Algorithm name                | deStruct                                                                                                                                                                                | Version | 0.1.0 |
| Command lines with parameters | python destruct.py --myconfig.ini --tmpdir silico2-temp --submit<br>asyncqsub --maxjobs 100 --repopulate --verbose silico2.lib silico2-<br>result/breakpoints silico2-result/breakreads |         |       |

Thresholds not indicated by command line

Reference ( check if unpublished  )

---

---

#### 4. Post-VCF filtering steps. (Command lines and parameters)

---

---

#### 5. (Optional) Any other comments or steps not covered.

After execution of deStruct, the output file 'breakpoints' is converted to VCF format using 'destruct2VCF.py' supplementary tool.

Calls with chimeric probability below 0.9 are filtered:

```
python destruct2VCF.py -b silico2-result/breakpoints -f silico2-result/filtered-reads -o silico2-result/result-gt0.9.vcf -a 0 -c 0.9 -v 0 -t 0
```

## ICGC-TCGA DREAM Somatic Mutation Calling Challenge Submission Documentation Form

|                 |                                                                                          |
|-----------------|------------------------------------------------------------------------------------------|
| Submission name | destruct-default_g_excluded                                                              |
| Team            | SFU                                                                                      |
| Submission type | <input checked="" type="checkbox"/> SV or <input type="checkbox"/> SNV (Only choose one) |

### 1. Read alignment. Did you use the BAM files provided?

Yes  No (Specify your aligner below)

|                               |         |
|-------------------------------|---------|
| Aligner                       | Version |
| Command lines with parameters |         |

### 2. Pre-processing steps to calibrate the BAM files. (Command lines and parameters)

### 3. Mutation calling algorithm.

|                               |                                                                                                                                                                                  |         |       |
|-------------------------------|----------------------------------------------------------------------------------------------------------------------------------------------------------------------------------|---------|-------|
| Algorithm name                | deStruct                                                                                                                                                                         | Version | 0.1.0 |
| Command lines with parameters | python destruct.py --myconfig.ini --tmpdir silico2-temp --submit asyncqsub --maxjobs 100 --repopulate --verbose silico2.lib silico2-result/breakpoints silico2-result/breakreads |         |       |

Thresholds not indicated by command line

Reference ( check if unpublished  )

---

---

#### 4. Post-VCF filtering steps. (Command lines and parameters)

---

---

#### 5. (Optional) Any other comments or steps not covered.

After execution of deStruct, low quality calls are manually filtered from the 'breakpoints' output file. Then the output is converted to VCF format using 'deconstruct2VCF.py' supplementary tool.

Alignment, chimeric and valid probabilities are set to be higher than 0.5:

```
python deconstruct2VCF.py -b silico2-result/breakpoints -f silico2-result/filtered-reads -o silico2-result/exclude-greens.vcf -a 0.5 -c 0.5 -v 0.5 -t 0
```

## ICGC-TCGA DREAM Somatic Mutation Calling Challenge Submission Documentation Form

|                 |                                                                                          |
|-----------------|------------------------------------------------------------------------------------------|
| Submission name | destruct-default                                                                         |
| Team            | SFU                                                                                      |
| Submission type | <input checked="" type="checkbox"/> SV or <input type="checkbox"/> SNV (Only choose one) |

### 1. Read alignment. Did you use the BAM files provided?

Yes  No (Specify your aligner below)

|                               |         |
|-------------------------------|---------|
| Aligner                       | Version |
| Command lines with parameters |         |

### 2. Pre-processing steps to calibrate the BAM files. (Command lines and parameters)

### 3. Mutation calling algorithm.

|                               |                                                                                                                                                                                         |         |       |
|-------------------------------|-----------------------------------------------------------------------------------------------------------------------------------------------------------------------------------------|---------|-------|
| Algorithm name                | deStruct                                                                                                                                                                                | Version | 0.1.0 |
| Command lines with parameters | python destruct.py --myconfig.ini --tmpdir silico2-temp --submit<br>asyncqsub --maxjobs 100 --repopulate --verbose silico2.lib silico2-<br>result/breakpoints silico2-result/breakreads |         |       |



Thresholds not indicated by command line

Reference ( check if unpublished  )

---

---

#### 4. Post-VCF filtering steps. (Command lines and parameters)

---

---

#### 5. (Optional) Any other comments or steps not covered.

After execution of deStruct, the output file 'breakpoints' is converted to VCF format using 'deconstruct2VCF.py' supplementary tool.

Alignment, chimeric and valid probabilities are set to be higher than 0.5:

```
python deconstruct2VCF.py -b silico2-result/breakpoints -f silico2-result/filtered-reads -o silico2-result/result.vcf -a 0.5 -c 0.5 -v 0.5 -t 0
```

## ICGC-TCGA DREAM Somatic Mutation Calling Challenge Submission Documentation Form

|                                                                                                  |                                                                                          |
|--------------------------------------------------------------------------------------------------|------------------------------------------------------------------------------------------|
| Submission name                                                                                  | destruct-final2                                                                          |
| Team                                                                                             | SFU                                                                                      |
| Submission type                                                                                  | <input checked="" type="checkbox"/> SV or <input type="checkbox"/> SNV (Only choose one) |
| <b>1. Read alignment. Did you use the BAM files provided?</b>                                    |                                                                                          |
| <input checked="" type="checkbox"/> Yes <input type="checkbox"/> No (Specify your aligner below) |                                                                                          |
| Aligner                                                                                          | Version                                                                                  |
| Command lines with parameters                                                                    |                                                                                          |
| <b>2. Pre-processing steps to calibrate the BAM files. (Command lines and parameters)</b>        |                                                                                          |

|                                       |                                                                                                                                                                                  |         |       |
|---------------------------------------|----------------------------------------------------------------------------------------------------------------------------------------------------------------------------------|---------|-------|
| <b>3. Mutation calling algorithm.</b> |                                                                                                                                                                                  |         |       |
| Algorithm name                        | deStruct                                                                                                                                                                         | Version | 0.1.0 |
| Command lines with parameters         | python destruct.py --myconfig.ini --tmpdir silico2-temp --submit asyncqsub --maxjobs 100 --repopulate --verbose silico2.lib silico2-result/breakpoints silico2-result/breakreads |         |       |

Thresholds not indicated by command line

Reference ( check if unpublished  )

---

---

#### 4. Post-VCF filtering steps. (Command lines and parameters)

---

---

#### 5. (Optional) Any other comments or steps not covered.

After execution of deStruct, the output file 'breakpoints' is converted to VCF format using 'destruct2VCF.py' supplementary tool.

Alignment, chimeric and valid probabilities are set to be higher than 0.8. Calls with tumor read support below 2 are filtered:

```
python destruct2VCF.py -b silico2-result/breakpoints -f silico2-result/filtered-reads -o silico2-result/destruct_tumour_2.vcf -a 0.8 -c 0.8 -v 0.8 -t 2
```

## ICGC-TCGA DREAM Somatic Mutation Calling Challenge Submission Documentation Form

|                                                                                           |                                         |                                                          |                                                |
|-------------------------------------------------------------------------------------------|-----------------------------------------|----------------------------------------------------------|------------------------------------------------|
| Submission name                                                                           | destruct-final3                         |                                                          |                                                |
| Team                                                                                      | SFU                                     |                                                          |                                                |
| Submission type                                                                           | <input checked="" type="checkbox"/> SV  | or                                                       | <input type="checkbox"/> SNV (Only choose one) |
| <b>1. Read alignment. Did you use the BAM files provided?</b>                             |                                         |                                                          |                                                |
|                                                                                           | <input checked="" type="checkbox"/> Yes | <input type="checkbox"/> No (Specify your aligner below) |                                                |
| Aligner                                                                                   |                                         | Version                                                  |                                                |
| Command lines with parameters                                                             |                                         |                                                          |                                                |
| <b>2. Pre-processing steps to calibrate the BAM files. (Command lines and parameters)</b> |                                         |                                                          |                                                |

|                                       |                                                                                                                                                                                         |         |       |
|---------------------------------------|-----------------------------------------------------------------------------------------------------------------------------------------------------------------------------------------|---------|-------|
| <b>3. Mutation calling algorithm.</b> |                                                                                                                                                                                         |         |       |
| Algorithm name                        | deStruct                                                                                                                                                                                | Version | 0.1.0 |
| Command lines with parameters         | python destruct.py --myconfig.ini --tmpdir silico2-temp --submit<br>asyncqsub --maxjobs 100 --repopulate --verbose silico2.lib silico2-<br>result/breakpoints silico2-result/breakreads |         |       |

Thresholds not indicated by command line

Reference ( check if unpublished  )

---

---

#### 4. Post-VCF filtering steps. (Command lines and parameters)

---

---

#### 5. (Optional) Any other comments or steps not covered.

After execution of deStruct, the output file 'breakpoints' is converted to VCF format using 'destruct2VCF.py' supplementary tool.

Alignment, chimeric and valid probabilities are set to be higher than 0.8. Calls with tumor read support below 3 are filtered:

```
python destruct2VCF.py -b silico2-result/breakpoints -f silico2-result/filtered-reads -o silico2-result/destruct_tumour_3.vcf -a 0.8 -c 0.8 -v 0.8 -t 3
```

## ICGC-TCGA DREAM Somatic Mutation Calling Challenge Submission Documentation Form

|                                                                                                  |                                                                                          |
|--------------------------------------------------------------------------------------------------|------------------------------------------------------------------------------------------|
| Submission name                                                                                  | destruct-final4                                                                          |
| Team                                                                                             | SFU                                                                                      |
| Submission type                                                                                  | <input checked="" type="checkbox"/> SV or <input type="checkbox"/> SNV (Only choose one) |
| <b>1. Read alignment. Did you use the BAM files provided?</b>                                    |                                                                                          |
| <input checked="" type="checkbox"/> Yes <input type="checkbox"/> No (Specify your aligner below) |                                                                                          |
| Aligner                                                                                          | Version                                                                                  |
| Command lines with parameters                                                                    |                                                                                          |
| <b>2. Pre-processing steps to calibrate the BAM files. (Command lines and parameters)</b>        |                                                                                          |

|                                       |                                                                                                                                                                                  |
|---------------------------------------|----------------------------------------------------------------------------------------------------------------------------------------------------------------------------------|
| <b>3. Mutation calling algorithm.</b> |                                                                                                                                                                                  |
| Algorithm name                        | deStruct Version 0.1.0                                                                                                                                                           |
| Command lines with parameters         | python destruct.py --myconfig.ini --tmpdir silico2-temp --submit asyncqsub --maxjobs 100 --repopulate --verbose silico2.lib silico2-result/breakpoints silico2-result/breakreads |

Thresholds not indicated by command line

Reference ( check if unpublished  )

---

---

#### 4. Post-VCF filtering steps. (Command lines and parameters)

---

---

#### 5. (Optional) Any other comments or steps not covered.

After execution of deStruct, the output file 'breakpoints' is converted to VCF format using 'destruct2VCF.py' supplementary tool.

Alignment, chimeric and valid probabilities are set to be higher than 0.8. Calls with tumor read support below 4 are filtered:

```
python destruct2VCF.py -b silico2-result/breakpoints -f silico2-result/filtered-reads -o silico2-result/destruct_tumour_4.vcf -a 0.8 -c 0.8 -v 0.8 -t 4
```

## ICGC-TCGA DREAM Somatic Mutation Calling Challenge Submission Documentation Form

|                                                                                                  |                                                                                          |
|--------------------------------------------------------------------------------------------------|------------------------------------------------------------------------------------------|
| Submission name                                                                                  | destruct-noqfilt                                                                         |
| Team                                                                                             | SFU                                                                                      |
| Submission type                                                                                  | <input checked="" type="checkbox"/> SV or <input type="checkbox"/> SNV (Only choose one) |
| <b>1. Read alignment. Did you use the BAM files provided?</b>                                    |                                                                                          |
| <input checked="" type="checkbox"/> Yes <input type="checkbox"/> No (Specify your aligner below) |                                                                                          |
| Aligner                                                                                          | Version                                                                                  |
| Command lines with parameters                                                                    |                                                                                          |
| <b>2. Pre-processing steps to calibrate the BAM files. (Command lines and parameters)</b>        |                                                                                          |

|                                       |                                                                                                                                                                                         |
|---------------------------------------|-----------------------------------------------------------------------------------------------------------------------------------------------------------------------------------------|
| <b>3. Mutation calling algorithm.</b> |                                                                                                                                                                                         |
| Algorithm name                        | deStruct Version 0.1.0                                                                                                                                                                  |
| Command lines with parameters         | python destruct.py --myconfig.ini --tmpdir silico2-temp --submit<br>asyncqsub --maxjobs 100 --repopulate --verbose silico2.lib silico2-<br>result/breakpoints silico2-result/breakreads |



Thresholds not indicated by command line

Reference ( check if unpublished  )

---

---

#### 4. Post-VCF filtering steps. (Command lines and parameters)

---

---

#### 5. (Optional) Any other comments or steps not covered.

After execution of deStruct, the output file 'breakpoints' is converted to VCF format using 'destruct2VCF.py' supplementary tool.

Alignment, chimeric and valid probabilities are set to be higher than 0.7. Calls with tumor read support below 2 are filtered:

```
python destruct2VCF.py -b silico2-result/breakpoints -f silico2-result/filtered-reads -o silico2-result/noqfilt.vcf -a 0.7 -c 0.7 -v 0.7 -t 2
```

## ICGC-TCGA DREAM Somatic Mutation Calling Challenge Submission Documentation Form

|                 |                                                                                          |
|-----------------|------------------------------------------------------------------------------------------|
| Submission name | destruct-split_read_filter                                                               |
| Team            | SFU                                                                                      |
| Submission type | <input checked="" type="checkbox"/> SV or <input type="checkbox"/> SNV (Only choose one) |

### 1. Read alignment. Did you use the BAM files provided?

Yes  No (Specify your aligner below)

|                               |         |
|-------------------------------|---------|
| Aligner                       | Version |
| Command lines with parameters |         |

### 2. Pre-processing steps to calibrate the BAM files. (Command lines and parameters)

### 3. Mutation calling algorithm.

|                               |                                                                                                                                                                                  |         |       |
|-------------------------------|----------------------------------------------------------------------------------------------------------------------------------------------------------------------------------|---------|-------|
| Algorithm name                | deStruct                                                                                                                                                                         | Version | 0.1.0 |
| Command lines with parameters | python destruct.py --myconfig.ini --tmpdir silico2-temp --submit asyncqsub --maxjobs 100 --repopulate --verbose silico2.lib silico2-result/breakpoints silico2-result/breakreads |         |       |

Thresholds not indicated by command line

Reference ( check if unpublished  )

---

---

#### 4. Post-VCF filtering steps. (Command lines and parameters)

---

---

#### 5. (Optional) Any other comments or steps not covered.

After execution of deStruct, the output file 'breakpoints' is converted to VCF format using 'destruct2VCF.py' supplementary tool.

Alignment, chimeric and valid probabilities are set to be higher than 0.5. Also calls not supported by split read mappings are filtered from output:

```
python destruct2VCF.py -b silico2-result/breakpoints -f silico2-result/filtered-reads -o silico2-result/result.vcf -a 0.5 -c 0.5 -v 0.5 -t 0
```

## ICGC-TCGA DREAM Somatic Mutation Calling Challenge Submission Documentation Form

|                 |                                                                                          |
|-----------------|------------------------------------------------------------------------------------------|
| Submission name | destruct-test5                                                                           |
| Team            | SFU                                                                                      |
| Submission type | <input checked="" type="checkbox"/> SV or <input type="checkbox"/> SNV (Only choose one) |

### 1. Read alignment. Did you use the BAM files provided?

Yes  No (Specify your aligner below)

|                               |         |
|-------------------------------|---------|
| Aligner                       | Version |
| Command lines with parameters |         |

### 2. Pre-processing steps to calibrate the BAM files. (Command lines and parameters)

### 3. Mutation calling algorithm.

|                               |                                                                                                                                                                                         |         |       |
|-------------------------------|-----------------------------------------------------------------------------------------------------------------------------------------------------------------------------------------|---------|-------|
| Algorithm name                | deStruct                                                                                                                                                                                | Version | 0.1.0 |
| Command lines with parameters | python destruct.py --myconfig.ini --tmpdir silico2-temp --submit<br>asyncqsub --maxjobs 100 --repopulate --verbose silico2.lib silico2-<br>result/breakpoints silico2-result/breakreads |         |       |

Thresholds not indicated by command line

Reference ( check if unpublished  )

---

---

#### 4. Post-VCF filtering steps. (Command lines and parameters)

---

---

#### 5. (Optional) Any other comments or steps not covered.

After execution of deStruct, the output file 'breakpoints' is converted to VCF format using 'destruct2VCF.py' supplementary tool.

Alignment, chimeric and valid probabilities are set to be higher than 0.7. Calls with tumor read support below 3 are filtered:

```
python destruct2VCF.py -b silico2-result/breakpoints -f silico2-result/filtered-reads -o silico2-result/original5.vcf -a 0.7 -c 0.7 -v 0.7 -t 3
```

## ICGC-TCGA DREAM Somatic Mutation Calling Challenge Submission Documentation Form

|                                                                                                  |                                                                                          |
|--------------------------------------------------------------------------------------------------|------------------------------------------------------------------------------------------|
| Submission name                                                                                  | destruct-test6                                                                           |
| Team                                                                                             | SFU                                                                                      |
| Submission type                                                                                  | <input checked="" type="checkbox"/> SV or <input type="checkbox"/> SNV (Only choose one) |
| <b>1. Read alignment. Did you use the BAM files provided?</b>                                    |                                                                                          |
| <input checked="" type="checkbox"/> Yes <input type="checkbox"/> No (Specify your aligner below) |                                                                                          |
| Aligner                                                                                          | Version                                                                                  |
| Command lines with parameters                                                                    |                                                                                          |
| <b>2. Pre-processing steps to calibrate the BAM files. (Command lines and parameters)</b>        |                                                                                          |

|                                       |                                                                                                                                                                                  |         |       |
|---------------------------------------|----------------------------------------------------------------------------------------------------------------------------------------------------------------------------------|---------|-------|
| <b>3. Mutation calling algorithm.</b> |                                                                                                                                                                                  |         |       |
| Algorithm name                        | deStruct                                                                                                                                                                         | Version | 0.1.0 |
| Command lines with parameters         | python destruct.py --myconfig.ini --tmpdir silico2-temp --submit asyncqsub --maxjobs 100 --repopulate --verbose silico2.lib silico2-result/breakpoints silico2-result/breakreads |         |       |

Thresholds not indicated by command line

Reference ( check if unpublished  )

---

---

#### 4. Post-VCF filtering steps. (Command lines and parameters)

---

---

#### 5. (Optional) Any other comments or steps not covered.

After execution of deStruct, the output file 'breakpoints' is converted to VCF format using 'destruct2VCF.py' supplementary tool.

Alignment, chimeric and valid probabilities are set to be higher than 0.7. Calls with tumor read support below 4 are filtered:

```
python destruct2VCF.py -b silico2-result/breakpoints -f silico2-result/filtered-reads -o silico2-result/original5.vcf -a 0.7 -c 0.7 -v 0.7 -t 4
```

## ICGC-TCGA DREAM Somatic Mutation Calling Challenge Submission Documentation Form

|                 |                                                                                          |
|-----------------|------------------------------------------------------------------------------------------|
| Submission name | destruct-tumor_count_filter                                                              |
| Team            | SFU                                                                                      |
| Submission type | <input checked="" type="checkbox"/> SV or <input type="checkbox"/> SNV (Only choose one) |

### 1. Read alignment. Did you use the BAM files provided?

Yes  No (Specify your aligner below)

|                               |         |
|-------------------------------|---------|
| Aligner                       | Version |
| Command lines with parameters |         |

### 2. Pre-processing steps to calibrate the BAM files. (Command lines and parameters)

### 3. Mutation calling algorithm.

|                               |                                                                                                                                                                                  |         |       |
|-------------------------------|----------------------------------------------------------------------------------------------------------------------------------------------------------------------------------|---------|-------|
| Algorithm name                | deStruct                                                                                                                                                                         | Version | 0.1.0 |
| Command lines with parameters | python destruct.py --myconfig.ini --tmpdir silico2-temp --submit asyncqsub --maxjobs 100 --repopulate --verbose silico2.lib silico2-result/breakpoints silico2-result/breakreads |         |       |



Thresholds not indicated by command line

Reference ( check if unpublished  )

---

---

#### 4. Post-VCF filtering steps. (Command lines and parameters)

---

---

#### 5. (Optional) Any other comments or steps not covered.

After execution of deStruct, the output file 'breakpoints' is converted to VCF format using 'destruct2VCF.py' supplementary tool.

Alignment, chimeric and valid probabilities are set to be higher than 0.5, and calls with tumor read support below 4 are filtered:

```
python destruct2VCF.py -b silico2-result/breakpoints -f silico2-result/filtered-reads -o silico2-result/result-gt4.vcf -a 0.5 -c 0.5 -v 0.5 -t 4
```

## ICGC-TCGA DREAM Somatic Mutation Calling Challenge Submission Documentation Form

|                 |                                                                                          |
|-----------------|------------------------------------------------------------------------------------------|
| Submission name | destruct-tumor_filter_del                                                                |
| Team            | SFU                                                                                      |
| Submission type | <input checked="" type="checkbox"/> SV or <input type="checkbox"/> SNV (Only choose one) |

### 1. Read alignment. Did you use the BAM files provided?

Yes  No (Specify your aligner below)

|                               |         |
|-------------------------------|---------|
| Aligner                       | Version |
| Command lines with parameters |         |

### 2. Pre-processing steps to calibrate the BAM files. (Command lines and parameters)

### 3. Mutation calling algorithm.

|                               |                                                                                                                                                                                  |         |       |
|-------------------------------|----------------------------------------------------------------------------------------------------------------------------------------------------------------------------------|---------|-------|
| Algorithm name                | deStruct                                                                                                                                                                         | Version | 0.1.0 |
| Command lines with parameters | python destruct.py --myconfig.ini --tmpdir silico2-temp --submit asyncqsub --maxjobs 100 --repopulate --verbose silico2.lib silico2-result/breakpoints silico2-result/breakreads |         |       |

Thresholds not indicated by command line

Reference ( check if unpublished  )

---

---

#### 4. Post-VCF filtering steps. (Command lines and parameters)

---

---

#### 5. (Optional) Any other comments or steps not covered.

After execution of deStruct, the output file 'breakpoints' is converted to VCF format using 'destruct2VCF.py' supplementary tool.

Alignment, chimeric and valid probabilities are set to be higher than 0.5. Output only contains deletion calls supported by tumor sample:

```
python destruct2VCF.py -b silico2-result/breakpoints -f silico2-result/filtered-reads -o silico2-result/del.vcf -a 0.5 -c 0.5 -v 0.5 -t 0
```

## ICGC-TCGA DREAM Somatic Mutation Calling Challenge Submission Documentation Form

|                 |                                                                                          |
|-----------------|------------------------------------------------------------------------------------------|
| Submission name | destruct-tumor_filter_dup                                                                |
| Team            | SFU                                                                                      |
| Submission type | <input checked="" type="checkbox"/> SV or <input type="checkbox"/> SNV (Only choose one) |

### 1. Read alignment. Did you use the BAM files provided?

Yes  No (Specify your aligner below)

|                               |         |
|-------------------------------|---------|
| Aligner                       | Version |
| Command lines with parameters |         |

### 2. Pre-processing steps to calibrate the BAM files. (Command lines and parameters)

### 3. Mutation calling algorithm.

|                               |                                                                                                                                                                                  |         |       |
|-------------------------------|----------------------------------------------------------------------------------------------------------------------------------------------------------------------------------|---------|-------|
| Algorithm name                | deStruct                                                                                                                                                                         | Version | 0.1.0 |
| Command lines with parameters | python destruct.py --myconfig.ini --tmpdir silico2-temp --submit asyncqsub --maxjobs 100 --repopulate --verbose silico2.lib silico2-result/breakpoints silico2-result/breakreads |         |       |

Thresholds not indicated by command line

Reference ( check if unpublished  )

---

---

#### 4. Post-VCF filtering steps. (Command lines and parameters)

---

---

#### 5. (Optional) Any other comments or steps not covered.

After execution of deStruct, the output file 'breakpoints' is converted to VCF format using 'destruct2VCF.py' supplementary tool.

Alignment, chimeric and valid probabilities are set to be higher than 0.5. Output only contains duplication calls supported by tumor sample.

```
python destruct2VCF.py -b silico2-result/breakpoints -f silico2-result/filtered-reads -o silico2-result/del.vcf -a 0.5 -c 0.5 -v 0.5 -t 0
```

## ICGC-TCGA DREAM Somatic Mutation Calling Challenge Submission Documentation Form

|                                                                                           |                                         |                                                          |                                                |
|-------------------------------------------------------------------------------------------|-----------------------------------------|----------------------------------------------------------|------------------------------------------------|
| Submission name                                                                           | destruct-tumor_filter_inv               |                                                          |                                                |
| Team                                                                                      | SFU                                     |                                                          |                                                |
| Submission type                                                                           | <input checked="" type="checkbox"/> SV  | or                                                       | <input type="checkbox"/> SNV (Only choose one) |
| <b>1. Read alignment. Did you use the BAM files provided?</b>                             |                                         |                                                          |                                                |
|                                                                                           | <input checked="" type="checkbox"/> Yes | <input type="checkbox"/> No (Specify your aligner below) |                                                |
| Aligner                                                                                   |                                         | Version                                                  |                                                |
| Command lines with parameters                                                             |                                         |                                                          |                                                |
| <b>2. Pre-processing steps to calibrate the BAM files. (Command lines and parameters)</b> |                                         |                                                          |                                                |

|                                       |                                                                                                                                                                                  |         |       |
|---------------------------------------|----------------------------------------------------------------------------------------------------------------------------------------------------------------------------------|---------|-------|
| <b>3. Mutation calling algorithm.</b> |                                                                                                                                                                                  |         |       |
| Algorithm name                        | deStruct                                                                                                                                                                         | Version | 0.1.0 |
| Command lines with parameters         | python destruct.py --myconfig.ini --tmpdir silico2-temp --submit asyncqsub --maxjobs 100 --repopulate --verbose silico2.lib silico2-result/breakpoints silico2-result/breakreads |         |       |

Thresholds not indicated by command line

Reference ( check if unpublished  )

---

---

#### 4. Post-VCF filtering steps. (Command lines and parameters)

---

---

#### 5. (Optional) Any other comments or steps not covered.

After execution of deStruct, the output file 'breakpoints' is converted to VCF format using 'destruct2VCF.py' supplementary tool.

Alignment, chimeric and valid probabilities are set to be higher than 0.5. Output only contains inversion calls supported by tumor sample.

```
python destruct2VCF.py -b silico2-result/breakpoints -f silico2-result/filtered-reads -o silico2-result/del.vcf -a 0.5 -c 0.5 -v 0.5 -t 0
```

## ICGC-TCGA DREAM Somatic Mutation Calling Challenge Submission Documentation Form

|                 |                                                                                          |
|-----------------|------------------------------------------------------------------------------------------|
| Submission name | destruct-valid_prob_filter                                                               |
| Team            | SFU                                                                                      |
| Submission type | <input checked="" type="checkbox"/> SV or <input type="checkbox"/> SNV (Only choose one) |

### 1. Read alignment. Did you use the BAM files provided?

Yes  No (Specify your aligner below)

|                               |         |
|-------------------------------|---------|
| Aligner                       | Version |
| Command lines with parameters |         |

### 2. Pre-processing steps to calibrate the BAM files. (Command lines and parameters)

### 3. Mutation calling algorithm.

|                               |                                                                                                                                                                                  |         |       |
|-------------------------------|----------------------------------------------------------------------------------------------------------------------------------------------------------------------------------|---------|-------|
| Algorithm name                | deStruct                                                                                                                                                                         | Version | 0.1.0 |
| Command lines with parameters | python destruct.py --myconfig.ini --tmpdir silico2-temp --submit asyncqsub --maxjobs 100 --repopulate --verbose silico2.lib silico2-result/breakpoints silico2-result/breakreads |         |       |



Thresholds not indicated by command line

Reference ( check if unpublished  )

---

---

#### 4. Post-VCF filtering steps. (Command lines and parameters)

---

---

#### 5. (Optional) Any other comments or steps not covered.

After execution of deStruct, the output file 'breakpoints' is converted to VCF format using 'destruct2VCF.py' supplementary tool. Calls with valid probability below 0.9 are filtered:

```
python destruct2VCF.py -b silico2-result/breakpoints -f silico2-result/filtered-reads -o silico2-result/result-gt0.9.vcf -a 0 -c 0 -v 0.9 -t 0
```

## ICGC-TCGA DREAM Somatic Mutation Calling Challenge Submission Documentation Form

|                 |                                                                                          |
|-----------------|------------------------------------------------------------------------------------------|
| Submission name | destruct-vcftest1 (ID: 2385643)                                                          |
| Team            | SFU                                                                                      |
| Submission type | <input checked="" type="checkbox"/> SV or <input type="checkbox"/> SNV (Only choose one) |

### 1. Read alignment. Did you use the BAM files provided?

Yes  No (Specify your aligner below)

|                               |         |
|-------------------------------|---------|
| Aligner                       | Version |
| Command lines with parameters |         |

### 2. Pre-processing steps to calibrate the BAM files. (Command lines and parameters)

### 3. Mutation calling algorithm.

|                               |                                                                                                                                                                                         |         |       |
|-------------------------------|-----------------------------------------------------------------------------------------------------------------------------------------------------------------------------------------|---------|-------|
| Algorithm name                | deStruct                                                                                                                                                                                | Version | 0.1.0 |
| Command lines with parameters | python destruct.py --myconfig.ini --tmpdir silico2-temp --submit<br>asyncqsub --maxjobs 100 --repopulate --verbose silico2.lib silico2-<br>result/breakpoints silico2-result/breakreads |         |       |

Thresholds not indicated by command line

Reference ( check if unpublished  )

---

---

#### 4. Post-VCF filtering steps. (Command lines and parameters)

---

---

#### 5. (Optional) Any other comments or steps not covered.

After execution of deStruct, the output file 'breakpoints' is converted to VCF format using 'destruct2VCF.py' supplementary tool.

Alignment, chimeric and valid probabilities are set to be higher than 0.6. Calls with tumor read support below 2 are filtered:

```
python destruct2VCF.py -b silico2-result/breakpoints -f silico2-result/filtered-reads -o silico2-result/original.vcf -a 0.6 -c 0.6 -v 0.6 -t 2
```

## ICGC-TCGA DREAM Somatic Mutation Calling Challenge Submission Documentation Form

|                                                                                           |                                         |                                                          |                                                |
|-------------------------------------------------------------------------------------------|-----------------------------------------|----------------------------------------------------------|------------------------------------------------|
| Submission name                                                                           | destruct-vcftest1 (ID: 2385670)         |                                                          |                                                |
| Team                                                                                      | SFU                                     |                                                          |                                                |
| Submission type                                                                           | <input checked="" type="checkbox"/> SV  | or                                                       | <input type="checkbox"/> SNV (Only choose one) |
| <b>1. Read alignment. Did you use the BAM files provided?</b>                             |                                         |                                                          |                                                |
|                                                                                           | <input checked="" type="checkbox"/> Yes | <input type="checkbox"/> No (Specify your aligner below) |                                                |
| Aligner                                                                                   |                                         | Version                                                  |                                                |
| Command lines with parameters                                                             |                                         |                                                          |                                                |
| <b>2. Pre-processing steps to calibrate the BAM files. (Command lines and parameters)</b> |                                         |                                                          |                                                |

|                                       |                                                                                                                                                                                         |         |       |
|---------------------------------------|-----------------------------------------------------------------------------------------------------------------------------------------------------------------------------------------|---------|-------|
| <b>3. Mutation calling algorithm.</b> |                                                                                                                                                                                         |         |       |
| Algorithm name                        | deStruct                                                                                                                                                                                | Version | 0.1.0 |
| Command lines with parameters         | python destruct.py --myconfig.ini --tmpdir silico2-temp --submit<br>asyncqsub --maxjobs 100 --repopulate --verbose silico2.lib silico2-<br>result/breakpoints silico2-result/breakreads |         |       |

Thresholds not indicated by command line

Reference ( check if unpublished  )

---

---

#### 4. Post-VCF filtering steps. (Command lines and parameters)

---

---

#### 5. (Optional) Any other comments or steps not covered.

After execution of deStruct, the output file 'breakpoints' is converted to VCF format using 'destruct2VCF.py' supplementary tool.

Alignment, chimeric and valid probabilities are set to be higher than 0.6. Calls with tumor read support below 3 are filtered:

```
python destruct2VCF.py -b silico2-result/breakpoints -f silico2-result/filtered-reads -o silico2-result/original.vcf -a 0.6 -c 0.6 -v 0.6 -t 3
```

## ICGC-TCGA DREAM Somatic Mutation Calling Challenge Submission Documentation Form

|                 |                                                                                          |
|-----------------|------------------------------------------------------------------------------------------|
| Submission name | destruct-vcftest1 (ID: 2385691)                                                          |
| Team            | SFU                                                                                      |
| Submission type | <input checked="" type="checkbox"/> SV or <input type="checkbox"/> SNV (Only choose one) |

### 1. Read alignment. Did you use the BAM files provided?

Yes  No (Specify your aligner below)

|                               |         |
|-------------------------------|---------|
| Aligner                       | Version |
| Command lines with parameters |         |

### 2. Pre-processing steps to calibrate the BAM files. (Command lines and parameters)

### 3. Mutation calling algorithm.

|                               |                                                                                                                                                                                         |         |       |
|-------------------------------|-----------------------------------------------------------------------------------------------------------------------------------------------------------------------------------------|---------|-------|
| Algorithm name                | deStruct                                                                                                                                                                                | Version | 0.1.0 |
| Command lines with parameters | python destruct.py --myconfig.ini --tmpdir silico2-temp --submit<br>asyncqsub --maxjobs 100 --repopulate --verbose silico2.lib silico2-<br>result/breakpoints silico2-result/breakreads |         |       |

Thresholds not indicated by command line

Reference ( check if unpublished  )

---

---

#### 4. Post-VCF filtering steps. (Command lines and parameters)

---

---

#### 5. (Optional) Any other comments or steps not covered.

After execution of deStruct, the output file 'breakpoints' is converted to VCF format using 'destruct2VCF.py' supplementary tool.

Alignment, chimeric and valid probabilities are set to be higher than 0.6. Calls with tumor read support below 4 are filtered:

```
python destruct2VCF.py -b silico2-result/breakpoints -f silico2-result/filtered-reads -o silico2-result/original2.vcf -a 0.6 -c 0.6 -v 0.6 -t 4
```

## ICGC-TCGA DREAM Somatic Mutation Calling Challenge Submission Documentation Form

|                                                                                                 |                                         |                                                          |                                                |
|-------------------------------------------------------------------------------------------------|-----------------------------------------|----------------------------------------------------------|------------------------------------------------|
| Submission name                                                                                 | destruct-vcftest1 (ID: 2385711)         |                                                          |                                                |
| Team                                                                                            | SFU                                     |                                                          |                                                |
| Submission type                                                                                 | <input checked="" type="checkbox"/> SV  | or                                                       | <input type="checkbox"/> SNV (Only choose one) |
| <hr/> <b>1. Read alignment. Did you use the BAM files provided?</b>                             |                                         |                                                          |                                                |
|                                                                                                 | <input checked="" type="checkbox"/> Yes | <input type="checkbox"/> No (Specify your aligner below) |                                                |
| Aligner                                                                                         |                                         | Version                                                  |                                                |
| Command lines with parameters                                                                   |                                         |                                                          |                                                |
| <hr/> <b>2. Pre-processing steps to calibrate the BAM files. (Command lines and parameters)</b> |                                         |                                                          |                                                |

|                                             |                                                                                                                                                                                         |         |       |
|---------------------------------------------|-----------------------------------------------------------------------------------------------------------------------------------------------------------------------------------------|---------|-------|
| <hr/> <b>3. Mutation calling algorithm.</b> |                                                                                                                                                                                         |         |       |
| Algorithm name                              | deStruct                                                                                                                                                                                | Version | 0.1.0 |
| Command lines with parameters               | python destruct.py --myconfig.ini --tmpdir silico2-temp --submit<br>asyncqsub --maxjobs 100 --repopulate --verbose silico2.lib silico2-<br>result/breakpoints silico2-result/breakreads |         |       |



Thresholds not indicated by command line

Reference ( check if unpublished  )

---

---

#### 4. Post-VCF filtering steps. (Command lines and parameters)

---

---

#### 5. (Optional) Any other comments or steps not covered.

After execution of deStruct, the output file 'breakpoints' is converted to VCF format using 'destruct2VCF.py' supplementary tool.

Alignment, chimeric and valid probabilities are set to be higher than 0.6. Calls with tumor read support below 5 are filtered:

```
python destruct2VCF.py -b silico2-result/breakpoints -f silico2-result/filtered-reads -o silico2-result/original3.vcf -a 0.6 -c 0.6 -v 0.6 -t 5
```

## ICGC-TCGA DREAM Somatic Mutation Calling Challenge Submission Documentation Form

|                                                                                           |                                         |                                                          |                                                |
|-------------------------------------------------------------------------------------------|-----------------------------------------|----------------------------------------------------------|------------------------------------------------|
| Submission name                                                                           | deStruct_1                              |                                                          |                                                |
| Team                                                                                      | SFU                                     |                                                          |                                                |
| Submission type                                                                           | <input checked="" type="checkbox"/> SV  | or                                                       | <input type="checkbox"/> SNV (Only choose one) |
| <b>1. Read alignment. Did you use the BAM files provided?</b>                             |                                         |                                                          |                                                |
|                                                                                           | <input checked="" type="checkbox"/> Yes | <input type="checkbox"/> No (Specify your aligner below) |                                                |
| Aligner                                                                                   |                                         | Version                                                  |                                                |
| Command lines with parameters                                                             |                                         |                                                          |                                                |
| <b>2. Pre-processing steps to calibrate the BAM files. (Command lines and parameters)</b> |                                         |                                                          |                                                |

|                                       |                                                                                                                                                                                  |         |                            |
|---------------------------------------|----------------------------------------------------------------------------------------------------------------------------------------------------------------------------------|---------|----------------------------|
| <b>3. Mutation calling algorithm.</b> |                                                                                                                                                                                  |         |                            |
| Algorithm name                        | deStruct                                                                                                                                                                         | Version | 0.1.1 (mrsFAST integrated) |
| Command lines with parameters         | python destruct.py --myconfig.ini --tmpdir silico3-temp --submit asyncqsub --maxjobs 100 --repopulate --verbose silico3.lib silico3-result/breakpoints silico3-result/breakreads |         |                            |

Thresholds not indicated by command line

Reference ( check if unpublished  )

---

---

#### 4. Post-VCF filtering steps. (Command lines and parameters)

---

---

#### 5. (Optional) Any other comments or steps not covered.

After execution of deStruct, the output file 'breakpoints' is converted to VCF format using 'destruct2VCF.py' supplementary tool.

Alignment, chimeric and valid probabilities are set to be higher than 0.95. Calls with tumor read support below 4 are filtered:

```
python destruct2VCF.py -b silico3-result/breakpoints -f silico3-result/filtered-reads -o silico3-result/out16-p0.95-t4-sub1.vcf -a 0.95 -c 0.95 -v 0.95 -t 4
```

Note that in this test version of deStruct, re-alignment of reads are performed with mrsFAST-Ultra as an alternative to bowtie2.

---

---

## ICGC-TCGA DREAM Somatic Mutation Calling Challenge Submission Documentation Form

|                                                                                                  |                                                                                          |
|--------------------------------------------------------------------------------------------------|------------------------------------------------------------------------------------------|
| Submission name                                                                                  | deStruct_2                                                                               |
| Team                                                                                             | SFU                                                                                      |
| Submission type                                                                                  | <input checked="" type="checkbox"/> SV or <input type="checkbox"/> SNV (Only choose one) |
| <b>1. Read alignment. Did you use the BAM files provided?</b>                                    |                                                                                          |
| <input checked="" type="checkbox"/> Yes <input type="checkbox"/> No (Specify your aligner below) |                                                                                          |
| Aligner                                                                                          | Version                                                                                  |
| Command lines with parameters                                                                    |                                                                                          |
| <b>2. Pre-processing steps to calibrate the BAM files. (Command lines and parameters)</b>        |                                                                                          |

|                                       |                                                                                                                                                                                  |         |                            |
|---------------------------------------|----------------------------------------------------------------------------------------------------------------------------------------------------------------------------------|---------|----------------------------|
| <b>3. Mutation calling algorithm.</b> |                                                                                                                                                                                  |         |                            |
| Algorithm name                        | deStruct                                                                                                                                                                         | Version | 0.1.1 (mrsFAST integrated) |
| Command lines with parameters         | python destruct.py --myconfig.ini --tmpdir silico3-temp --submit asyncqsub --maxjobs 100 --repopulate --verbose silico3.lib silico3-result/breakpoints silico3-result/breakreads |         |                            |

Thresholds not indicated by command line

Reference ( check if unpublished  )

---

---

#### 4. Post-VCF filtering steps. (Command lines and parameters)

---

---

#### 5. (Optional) Any other comments or steps not covered.

After execution of deStruct, the output file 'breakpoints' is converted to VCF format using 'destruct2VCF.py' supplementary tool.

Alignment, chimeric and valid probabilities are set to be higher than 0.6. Calls with tumor read support below 2 are filtered:

```
python destruct2VCF.py -b silico3-result/breakpoints -f silico3-result/filtered-reads -o silico3-result/out23-p0.6-t2-sub2.vcf -a 0.6 -c 0.6 -v 0.6 -t 2
```

Note that in this test version of deStruct, re-alignment of reads are performed with mrsFAST-Ultra as an alternative to bowtie2.

---

---

## ICGC-TCGA DREAM Somatic Mutation Calling Challenge Submission Documentation Form

|                 |                                                                                          |
|-----------------|------------------------------------------------------------------------------------------|
| Submission name | deStruct_o2                                                                              |
| Team            | SFU                                                                                      |
| Submission type | <input checked="" type="checkbox"/> SV or <input type="checkbox"/> SNV (Only choose one) |

1. Read alignment. Did you use the BAM files provided?

Yes  No (Specify your aligner below)

|                               |         |
|-------------------------------|---------|
| Aligner                       | Version |
| Command lines with parameters |         |

2. Pre-processing steps to calibrate the BAM files. (Command lines and parameters)

3. Mutation calling algorithm.

|                               |                                                                                                                                                                                  |         |       |
|-------------------------------|----------------------------------------------------------------------------------------------------------------------------------------------------------------------------------|---------|-------|
| Algorithm name                | deStruct                                                                                                                                                                         | Version | 0.1.1 |
| Command lines with parameters | python destruct.py --myconfig.ini --tmpdir silico3-temp --submit asyncqsub --maxjobs 100 --repopulate --verbose silico3.lib silico3-result/breakpoints silico3-result/breakreads |         |       |

Thresholds not indicated by command line

Reference ( check if unpublished  )

---

---

#### 4. Post-VCF filtering steps. (Command lines and parameters)

---

---

#### 5. (Optional) Any other comments or steps not covered.

After execution of deStruct, the output file 'breakpoints' is converted to VCF format using 'destruct2VCF.py' supplementary tool.

Alignment, chimeric and valid probabilities are set to be higher than 0.2:

```
python destruct2VCF.py -b silico3-result/breakpoints -f silico3-result/filtered-reads -o silico3-result/out3-p0.2-t0-sub2.vcf -a 0.2 -c 0.2 -v 0.2 -t 0
```

## ICGC-TCGA DREAM Somatic Mutation Calling Challenge Submission Documentation Form

|                                                                                                  |                                                                                          |
|--------------------------------------------------------------------------------------------------|------------------------------------------------------------------------------------------|
| Submission name                                                                                  | deStruct_o3                                                                              |
| Team                                                                                             | SFU                                                                                      |
| Submission type                                                                                  | <input checked="" type="checkbox"/> SV or <input type="checkbox"/> SNV (Only choose one) |
| <b>1. Read alignment. Did you use the BAM files provided?</b>                                    |                                                                                          |
| <input checked="" type="checkbox"/> Yes <input type="checkbox"/> No (Specify your aligner below) |                                                                                          |
| Aligner                                                                                          | Version                                                                                  |
| Command lines with parameters                                                                    |                                                                                          |
| <b>2. Pre-processing steps to calibrate the BAM files. (Command lines and parameters)</b>        |                                                                                          |

|                                       |                                                                                                                                                                                  |         |       |
|---------------------------------------|----------------------------------------------------------------------------------------------------------------------------------------------------------------------------------|---------|-------|
| <b>3. Mutation calling algorithm.</b> |                                                                                                                                                                                  |         |       |
| Algorithm name                        | deStruct                                                                                                                                                                         | Version | 0.1.1 |
| Command lines with parameters         | python destruct.py --myconfig.ini --tmpdir silico3-temp --submit asyncqsub --maxjobs 100 --repopulate --verbose silico3.lib silico3-result/breakpoints silico3-result/breakreads |         |       |



Thresholds not indicated by command line

Reference ( check if unpublished  )

---

---

#### 4. Post-VCF filtering steps. (Command lines and parameters)

---

---

#### 5. (Optional) Any other comments or steps not covered.

After execution of deStruct, the output file 'breakpoints' is converted to VCF format using 'destruct2VCF.py' supplementary tool.

Alignment, chimeric and valid probabilities are set to be higher than 0.1:

```
python destruct2VCF.py -b silico3-result/breakpoints -f silico3-result/filtered-reads -o silico3-result/merge-1and3-sub3.vcf -a 0.1 -c 0.1 -v 0.1 -t 0
```

## ICGC-TCGA DREAM Somatic Mutation Calling Challenge Submission Documentation Form

|                 |                                                                                          |
|-----------------|------------------------------------------------------------------------------------------|
| Submission name | deStruct-org                                                                             |
| Team            | SFU                                                                                      |
| Submission type | <input checked="" type="checkbox"/> SV or <input type="checkbox"/> SNV (Only choose one) |

1. Read alignment. Did you use the BAM files provided?

Yes  No (Specify your aligner below)

|                               |         |
|-------------------------------|---------|
| Aligner                       | Version |
| Command lines with parameters |         |

2. Pre-processing steps to calibrate the BAM files. (Command lines and parameters)

3. Mutation calling algorithm.

|                               |                                                                                                                                                                                  |         |       |
|-------------------------------|----------------------------------------------------------------------------------------------------------------------------------------------------------------------------------|---------|-------|
| Algorithm name                | deStruct                                                                                                                                                                         | Version | 0.1.1 |
| Command lines with parameters | python destruct.py --myconfig.ini --tmpdir silico3-temp --submit asyncqsub --maxjobs 100 --repopulate --verbose silico3.lib silico3-result/breakpoints silico3-result/breakreads |         |       |

Thresholds not indicated by command line

Reference ( check if unpublished  )

---

---

#### 4. Post-VCF filtering steps. (Command lines and parameters)

---

---

#### 5. (Optional) Any other comments or steps not covered.

After execution of deStruct, the output file 'breakpoints' is converted to VCF format using 'destruct2VCF.py' supplementary tool.

Alignment, chimeric and valid probabilities are set to be higher than 0.6. Calls with tumor read support below 2 are filtered:

```
python destruct2VCF.py -b silico3-result/breakpoints -f silico3-result/filtered-reads -o silico3-result/out1-p0.6-t2-sub1.vcf -a 0.6 -c 0.6 -v 0.6 -t 2
```
